# Supplementary material
Source: PubMed Central journal article supplement (PMC7573797)
Supplement: jamapediatr-e203359-s001.pdf [file jamapediatr-e203359-s001.pdf]

1  
2  
3  
4  
5  
6  
7  
8  
9  
10  
11  
12  
13  
14  
15  
16  
17  
18  
19  
20  
21  
22  
23  
24  
25  
26  
27  
28  
29  
30  
31  
32  
33  
34  
35  
36  
37  
38  
39  
40  
41  
42  
43  
44  
45  
46

## Study Protocol and Statistical Analysis Plan (SAP)

MULTI-CENTER RANDOMIZED CONTROLLED TRIAL OF REFEEDING IN ANOREXIA NERVOSA:  
The Study of Refeeding to Optimize iNpatient Gains (StRONG)

|                                |                                                                                                                                                                                                                                                                             |
|--------------------------------|-----------------------------------------------------------------------------------------------------------------------------------------------------------------------------------------------------------------------------------------------------------------------------|
| Principal Investigators        | Andrea Garber, PhD, RD<br>Professor of Pediatrics<br>Division of Adolescent & Young Adult Medicine<br>UCSF Benioff Children's Hospital<br>University of California, San Francisco<br>3333 California St, Suite 245, Box 0503<br>San Francisco, CA 94143<br>ph: 415-514-2180 |
|                                | Neville Golden, MD<br>Chief, Division of Adolescent Medicine<br>Marron and Mary Elizabeth Kendrick Professor in Pediatrics<br>Stanford University School of Medicine<br>770 Welch Road, Suite 100<br>Palo Alto, CA 94304<br>ph: 650-736-9557                                |
| Protocol identification number | UCSF IRB # 15-16368                                                                                                                                                                                                                                                         |
| ClinicalTrials.gov identifier  | NCT02488109                                                                                                                                                                                                                                                                 |
| Author                         | Andrea Garber                                                                                                                                                                                                                                                               |
| Version (Date)                 | 1.3 (July 31, 2019)                                                                                                                                                                                                                                                         |
| Senior Statistician            | Jing Cheng, MD, PhD<br>Professor<br>UCSF School of Dentistry<br>Department of Preventive & Restorative Dental Science<br>University of California, San Francisco<br>707 Parnassus Ave, 1026, Box 1361<br>San Francisco, CA 94143<br>ph: 415-502-0129                        |

47  
48  
49 **Abbreviations**

50  
51 AAN Atypical anorexia nervosa  
52 AN Anorexia nervosa  
53 DCC Data Coordination Center  
54 DSM-5 Diagnostic and Statistical Manual of Mental Disorders, fifth edition  
55 EDE Eating Disorder Examination  
56 EDE-Q Eating Disorder Examination-Questionnaire  
57 HCR Higher Calorie Refeeding  
58 kcal Calories  
59 LCR Lower Calorie Refeeding  
60 mBMI median Body Mass Index (for age and sex)  
61 SOC Standard of Care

64  
65 **Table of Contents**  
66

67 STUDY PROTOCOL

68 **1. Introduction** ..... 3  
69 **2. Study Design** ..... 3  
70 2.1. Study Population ..... 3  
71 2.2 Randomization ..... 4  
72 **3. Study Procedures** ..... 4  
73 3.1. Treatment and Follow-up ..... 4 - 5  
74 3.2 Data Collection ..... 6 - 7  
75 3.3 Safety ..... 7  
76

77 STATISTICAL ANALYSIS PLAN

78 **1. Aims and Objectives** ..... 8  
79 **2. Statistical Methods** ..... 8  
80 2.1. Pool of Participants ..... 8  
81 2.2 Outcomes ..... 8 – 10  
82 2.3. Power and Sample-size Considerations ..... 10  
83 2.4 Data Management ..... 10 – 11  
84 2.5 Retention and Attrition ..... 11  
85

86 APPENDIX

87 1. Amendments to the Protocol ..... 12  
88 2. Amendments to the Statistical Analysis Plan ..... 13  
89  
90  
91  
92  
93

94  
95 **PROTOCOL Version 1.3 (See Table of Amendments)**

96 Multi-Center Randomized Controlled Trial of Refeeding in Anorexia Nervosa

97  
98  
99 **1. Introduction**

100  
101 Current recommendations to guide the clinical care of AN patients hospitalized with medical instability due  
102 to malnutrition are based solely on retrospective or observational studies and/or clinical experience. No  
103 studies to date have prospectively tested high calorie refeeding (HCR) and the long-term impact on  
104 recovery is unknown. Consensus has developed over recent decades that patient safety can only be  
105 guaranteed using low calorie refeeding (LCR). The entrenchment of clinical practice without supporting  
106 evidence is a widely recognized dilemma in healthcare. While RCTs are considered the “gold standard” to  
107 establish evidence-based medicine, until recently there was insufficient data to propose such a study of  
108 refeeding in AN. We now have preliminary findings to indicate that LCR might be too cautious and that  
109 HCR appears feasible and may improve long-term recovery. Thus, we are poised to compare these two  
110 treatments in a parallel, randomized fashion.

111  
112 **2. Study Design**

113  
114 The purpose of this multi-center randomized controlled trial is to compare LCR vs. HCR refeeding  
115 strategies for hospitalized adolescents with AN. Participants will be recruited upon hospital admission at two  
116 centers (UCSF and Stanford) to maximize sample size, and randomly assigned 1:1 within site to one of the  
117 two strategies. A total of 120 participants age 12-24 yrs who meet DSM-5 diagnostic criteria for AN and  
118 atypical AN and present as medically unstable due to malnutrition will be enrolled. Treatments will not be  
119 blinded, since both the patients and clinicians who work with this population are highly skilled at estimating  
120 kcal and would be able to determine their group assignment by simply viewing the meal trays. In addition,  
121 target kcal will be reached faster in HCR and this would be apparent on physician orders. The proposed  
122 study is powered to detect a meaningful difference in clinical remission (Aim 1A).

123  
124 **2.1. Study Population**

- 125  
126 a. **Inclusion/Exclusion:** Adolescents hospitalized for medical instability secondary to malnutrition will be  
127 eligible as follows. **Inclusion criteria:** diagnosis of AN, atypical AN, age 12-24 years, no hospital  
128 admissions for the previous six months, and meet hospitalization criteria (daytime HR < 50 bpm or night  
129 time HR < 45 bpm, BP <90/45 mmHg, temperature < 35.6° C or orthostasis defined by increase in HR >  
130 35 bpm or decrease in systolic BP > 20 mmHg from lying to standing). **Exclusion criteria:** diagnosis of  
131 bulimia nervosa [DSM-5], currently in remission (as defined by weight and EDE-Q score per Aim 1),  
132 admission for food refusal without malnutrition, current pregnancy, chronic disease (e.g.  
133 immune/endocrine disorders, pulmonary, cardiac, or renal disease), current suicidality or psychosis.  
134
- 135 b. **Participant recruitment and consent:** Participants and their parents will sign assent (for those < 18 yr) and  
136 consent, respectively within 24 hr of hospitalization. This may occur in the clinic when they are deemed  
137 medically unstable and waiting transfer to the hospital or in the hospital if admitted directly. Consent will  
138 include permission to review all medical records, to review hospital billing data, and to contact for future  
139 research projects. If a participant turns 18 yr while enrolled, s/he will be reconsented. Participants 18 years  
140 of age and older are able to consent themselves; thus we will request verbal consent from their parents to  
141 complete parent surveys.  
142  
143  
144

## 2.2. Randomization

Participants will be stratified by site and randomly assigned 1:1 to the two intervention strategies within 24 hr of hospital admission. The Data Coordination Center (DCC) will provide a secure unpredictable allocation sequence (e.g. A B B A ...) which will be programmed into a secure electronic study tracking system for assignment of each accrued participant. The sequences will be generated using block size of two to four to maximize balance between arms throughout accrual while ensuring the sequences remain unpredictable. As patients consent to study participation, clinical-research staff will assign the next available study ID number in sequence, identify the allocated intervention arm, and inform participants and their families of the assignment. In turn, the clinical research staff will provide the linked study ID number and Medical Record Number to the DCC, which will store this Personal Health Information in a HIPAA-compliant manner along with the intervention assignment.

## 3. Study Procedures

### 3.1. Treatment and Follow-up

- a. Study groups: Upon randomization, the Lower Calorie Refeeding (LCR) group will begin with 1400 kcal per day; Higher Calorie Refeeding (HCR) group will commence at 2000 kcal. Given our previous findings, recognition of the so-called underfeeding syndrome and recent clinical experience, we will not test a 1200 calorie diet even though it is still currently recommended. Our previous studies have adequately demonstrated that a 1200 kcal diet produces initial weight loss and therefore do not feel it is ethical to assign participants to this treatment. We chose 1400 kcal to start because in our previously study of LCR, weight loss ceased on day 3 in hospital when diets averaging 1411(299) kcal were prescribed. Diet prescriptions will increase by 200 kcal every other day in LCR and 200 kcal per day in HCR until a target level is reached. Target kcal are calculated upon admission as percent of energy needs using Estimated Energy Requirement (EER) equations from the Institute of Medicine. These equations are used clinically to set goals for caloric advancement although they are known to underestimate energy needs in patients with anorexia. Therefore, we maximize these estimations by using target weight corresponding to the mBMI for age and sex (rather than current weight), a moderate activity factor of 1.2-1.3 (despite bed rest), and additional 500 kcal (if current weight < the MBMI).
- b. Intervention (refeeding protocols): During hospitalization, participants will follow a meal-based refeeding protocol that calls for eating three meals and three snacks per day, served on trays at the bedside, in the presence of 'Room Sitters'. The calorie level of the diet will be prescribed by the physicians per study protocol and the meals will be prepared by hospital foodservice. The study PI (Garber) will work with the Research Registered Dietitian (RD) and nutrition staff at both sites to ensure that menu selections fit the general macronutrient distribution of 30-40% fat, 15-25% protein and 35-55% carbohydrate. Menus will be continually analyzed (Software v.17.9.5, Computrition, Inc., Chatsworth, CA) to ensure conformance to this distribution as menu items are added or change over time. Dietetic Technicians will keep daily calorie counts, per Standard of Care (SOC), showing actual kcal consumed from food and formula.

A high energy liquid supplement ("formula") providing 1.5 kcal per mL (360 kcal per 240 mL can) will be used orally as needed to replace kcal refused in meals or snacks per a standard calorie replacement protocol. We previously reported a greater than 98% concordance between kcal prescribed and actual kcal ingested using this method, as well as an equal proportion of kcal intake from formula in LCR and HCR groups. This finding supports our clinical observation that HCR meals can be completed without additional reliance on drinking formula. However, most AN patients do experience discomfort during refeeding and therefore all participants will receive SOC meal support including emotional support and techniques such as distraction. All beverages will be weighed and measured before placement on the tray, with a 1.5 L per day free water restriction. Room sitters will observe intake of all meals/snacks and remain in the room for 45 min afterwards.

198  
199  
200  
201  
202  
203  
204  
205  
206  
207  
208  
209  
210  
211  
212  
213  
214  
215  
216  
217  
218  
219  
220  
221  
222  
223  
224  
225  
226  
227  
228  
229  
230  
231  
232  
233  
234  
235  
236

- c. Monitoring of electrolytes: Blood for electrolytes will be obtained between 5 and 7 am every 24hr for the first 7 days and more frequently if needed. Since the risk of refeeding decreases after the first week, electrolytes will be monitored every other day starting on day 8 unless there is continued evidence of abnormalities.
- d. Correction of electrolyte abnormalities: Electrolyte abnormalities (serum phosphorus < 3 mg/dL, magnesium ≤ 1.7 mg/dL, or potassium < 3.5 mEq/L) will be corrected with a standardized protocol for both sites. Patients with hypophosphatemia will be treated with sodium potassium phosphate, 250 mg per packet (8 mmol phosphorus, 7.1 mEq potassium), one packet three times a day by mouth for a serum phosphorus between 2.5 and 2.9 mg/dL, two packets (500 mg) three times a day for a serum phosphorus of 2.0 - 2.5 mg/dL, and if serum phosphorus is < 2.0 mg/dL then intravenous sodium potassium phosphorus will be initiated at a dose of 0.24 mmol/kg (max of 15 mmol per dose). The PICU will be contacted and labs will be rechecked STAT 4 hours after the infusion is completed. Those with hypomagnesemia will be prescribed magnesium oxide (150 mg elemental Mg per tablet), one tablet three times a day by mouth for a serum magnesium between 1.3-1.7 mg/dL; two tablets three times a day by mouth for a serum magnesium between 1.0-1.2 mg/dL. In the case of serum magnesium below 1.0 mg/dL, the PICU will be called for possible transfer, and intravenous magnesium sulfate will be started at a dose of 50 mg/kg (max of 2 grams per dose). Labs will be rechecked STAT 2 hours after infusion completed: If repeat serum mag still < 1.0 mg/dL, repeat same dose of magnesium sulfate IV; If repeat serum mag > 1.0, begin PO Mag, at PO dose indicated above. Those with hypokalemia will be prescribed extended release potassium chloride by mouth, 20 mEq for a serum potassium of 3.1-3.4 mmol/L; and 40 mEq for a serum potassium of 2.5-3.0 mmol/L. For a serum potassium between 2.2 - 2.5 mmol/L, 40 mEq extended release potassium chloride will be given STAT and the PICU will be called for possible transfer. Labs will be rechecked in 4 hours (peak) and 12 hours (estimated nadir). For any serum value of potassium < 2.2 mmol/L, intravenous potassium chloride will be initiated and PICU will be called for transfer. Declining electrolyte levels that are in the normal range will not be treated. Participants will also receive a SOC supplement regimen including 500mg elemental calcium with vitamin D twice per day and an adult multivitamin with minerals once per day.
- e. Study time points: Participants will be followed prospectively in hospital with daily measures of calorie and supplement intake and weight from admission through discharge. Patients will be discharged when medically stable, with the primary criterion of heart rate ≥ 45 bpm for least 24 hr. Full medical stability defined as HR ≥ 45 bpm for 24 hrs, temperature ≥ 35.6°C for 24 hrs, ≥ 75% of mBMI, BP ≥ 90/45 mmHg for 24 hrs or if systolic BP < 90 then asymptomatic and all else stable, orthostatic change in HR ≤ 35 bpm or if > 35 then asymptomatic and all else stable; and orthostatic change in SBP ≤ 20 mmHg or if > 20 then asymptomatic and all else stable.

**Timing of Procedures: Table 1**

|                                     | INPATIENT |       |     | OUTPATIENT FOLLOW---UP |      |      |      |       |
|-------------------------------------|-----------|-------|-----|------------------------|------|------|------|-------|
|                                     | Admit     | Daily | DC* | 10 dy                  | 1 Mo | 3 Mo | 6 Mo | 12 Mo |
| <b>MEDICINE/NURSING PROCEDURES</b>  |           |       |     |                        |      |      |      |       |
| Weight                              | SOC       | SOC   | SOC | X                      | X    | X    | X    | X     |
| Height                              | SOC       |       |     | X                      | X    | X    | X    | X     |
| Vital Signs                         | SOC       | SOC   | SOC | X                      | X    | X    | X    | X     |
| Electrolyte monitoring ¥            | SOC       | X     | SOC |                        |      |      |      |       |
| <b>NUTRITION PROCEDURES</b>         |           |       |     |                        |      |      |      |       |
| 24---hr food recall                 | X         |       |     | X                      | X    | X    | X    | X     |
| <b>QUESTIONNAIRE ADMINISTRATION</b> |           |       |     |                        |      |      |      |       |
| EDE-Q                               | X         |       | X   |                        | X    | X    | X    | X     |
| HCUMS survey                        |           |       |     | X                      | X    | X    | X    | X     |
| Demogr & Eating Disorder            | X         |       |     |                        |      |      |      |       |

|                |  |  |  |   |   |   |   |   |
|----------------|--|--|--|---|---|---|---|---|
| Follow-up form |  |  |  | X | X | X | X | X |
|----------------|--|--|--|---|---|---|---|---|

\* DC = discharge; SOC = Standard Of Care; Rnd = Randomization; ¥ SOC is every other day; we will monitor daily as part of Aim 2.

### 3.2. Data Collection

Other than the treatment we are testing (HCR vs. LCR), patients will receive SOC in the hospital. Thus, as shown in **Table 1**, the vast majority of procedures in hospital are SOC. Follow-up visits, on the other hand, are for the purpose of collecting data and will be scheduled at the designated time points.

- a. **Baseline data collection:** The following covariates will be collected upon admission, prior to randomization.
  - (1) Demographics and eating disorder history: an intake form will be self-administered (with study coordinator as proctor, 15 min) to assess: highest body weight, lowest body, date of onset (to calculate length of illness and rapidity of weight loss), family history of eating disorder, self-reported race/ethnicity, maternal education and zipcode (to indicate socioeconomic status), date of birth.
  - (2) Eating Disorder Examination-Questionnaire (EDE-Q): is a standardized research interview that measures eating disorders psychopathology. Dr. Le Grange (co-I, UCSF) has used this tool extensively in RCTs examining psychotherapeutic modalities and long-term recovery in AN and BN and to categorize lower and higher risk study participants. He will oversee the psychological aspects of this study, including the EDE-Q.
  - (3) Food recall: dietary intake for the day prior to hospital admission will be assessed with a 24-hr food recall by the Research RD and analyzed via Nutrition Data System for Research (NDS-R) for total kcal and macronutrient profile. Dietary Density (DDS) and Variety Scores (DVS) will be calculated since acceptance of more energy dense and variety of foods in hospital has been shown to predict recovery at 8 mo.
  - (4) Severity of illness: %mBMI and HR on admission
  - (5) Health Care Utilization and Missed School (HCUMS) Survey: This proctored interview draws from established tools to assess cost, and has been tailored for AN and integrated with the follow-up form (above). In addition to to “other care”, it assesses health care utilization in the 6 months prior to admission including medications, physician visits, dental visits, ER visits and laboratory testing. It will be administered by trained research staff, who will document parent- and participant-reported care, supplemented with dates, doses, and other details available in the medical record.
  
- b. **Data collection daily in Hospital:**
  - (1) SOC in hospital: Participants will be followed daily in hospital. Consistent with SOC for these patients, night time HR will be assessed with continuous cardiac monitoring throughout hospital stay, temperature will be measured orally and BP will be measured every 4-8 hr. Postural changes will be assessed with supine measurements (after 5 min), followed by standing measurements (after 2 min). When multiple vital signs measures are taken per protocol during one hospital day or one outpatient clinic visit, the most deviant value (lowest HR, lowest BP, greatest increase in HR and greatest decrease in BP on orthostatic changes, lowest Temp) will be recorded. Weight is measured every morning upon waking after voiding on an electronic scale, with the subject wearing only a hospital gown. Height will be measured within 24 hours of admission with wall-mounted stadiometer. Electrolytes will be monitored per SOC as described above in 3.1.c.
  - (2) Study in hospital: Participants at both sites will complete the questionnaires above.
  
- c. **Data collection during follow-up:** Participants will return for five study follow-up visits through 12



months post-discharge and complete the following procedures:

- (1) Anthropometrics and vital signs: Height, weight and vital signs will be measured according to the in-hospital protocol by trained medical staff with standard equipment. Vital sign measures will be taken after a 20-min rest to minimize the influence of activity required to attend the visit (e.g. walk from car). After resting, vital signs will be measured in the research center with standard, calibrated equipment and with postural changes according to the procedure above. Data will be entered directly into the electronic data capture system with fillable and constrained sections for anthropometric measures and vital signs to minimize error.
- (2) Food recall: dietary intake for one full day during the week of each follow-up visit will be assessed with a 24-hr food recall by the Research Dietitian.
- (3) HCUMS Survey: As described above, this proctored survey will assess utilization of health care such as re-hospitalizations since the time of the study-related hospitalization, participation in eating disorder treatment programs, medications, missed school, missed work, and other direct and indirect costs associated with eating disorder care since the time of each prior follow-up visit. The HCUMS will document medications pertinent to recovery measures (menses and psychopathology), including medications, current mental health care, other medical and psychological/psychiatric care (“other care”) outside of our medical centers (e.g. residential care, psychiatric hospitalization). Psychotherapy modality and adherence may be important prognostic covariates of long-term outcomes in this open follow-up study.

### 3.3. Safety

This study begins with a hospitalization as per SOC for patients who are medically unstable with malnutrition secondary to AN. Patients will be admitted to the adolescent medicine service if they are deemed medically unstable per published criteria. Once admitted, patients will be eligible for study enrollment. The treatment (HCR or LCR) is limited to the hospital stay. Aside from the questionnaires at both sites and daily (instead of every other day) electrolyte monitoring, all hospital procedures are consistent with SOC. After discharge, participants will be followed openly. They are required to be under a physician’s care to ensure medical stability but not required to receive that care from us (however many do). Many patients have a psychiatrist to manage psychiatric co-morbidities such as anxiety and depression. If they receive care or hospitalization elsewhere they can still continue in the study and we will collect that with our follow-up form.

- a. Prospective monitoring of AEs: Aim 2 specifies three electrolyte abnormalities that will be monitored prospectively in all participants and documented as described in **3.1.c.&d.**: hypophosphatemia (<3 mg/dL), 2B) hypomagnesaemia ( $\leq 1.7$  mg/dL), and 2C) hypokalemia (<3.5 mEq/L).
- b. Data and Safety Monitoring Board (DSMB): As a multi-center clinical trial comparing treatments, the proposed study is required to have a DSMB according to the NICHD policy for clinical research monitoring. The purpose of the DSMB is to ensure the safety of participants and validity of the trial. We will draft a DSM Plan using the NICHD template.



335 **STATISTICAL ANALYSIS PLAN (most recent change May 26, 2019)**  
336 Multi-Center Randomized Controlled Trial of Refeeding in Anorexia Nervosa

337  
338 **1. Aims and Objectives**

339 Our study has three main aims. We will compare:

340  
341 **AIM 1: Efficacy** of LCR vs. HCR. We hypothesize that LCR and HCR will differ by *achievement and maintenance of*: (1A) clinical remission during 12 mo follow-up, defined by achievement of both-(i) weight  $\geq$  95% median BMI (MBMI) for age and sex, and (ii) Eating Disorder Examination-Questionnaire (EDE-Q) global score within 1 SD of clinical norm, and (1B) medical stability during initial hospitalization, defined by published vital sign thresholds.

342  
343 **AIM 2: Safety** of LCR vs. HCR during initial hospitalization. We hypothesize that LCR and HCR will *not* differ by *incidence of*: 2A) hypophosphatemia ( $<3$  mg/dL), 2B) hypomagnesaemia ( $\leq 1.7$  mg/dL), and 2C) hypokalemia ( $<3.5$  mEq/L).

344  
345 **AIM 3: Cost-effectiveness (CE)** of LCR vs. HCR. We hypothesize that HCR will be more cost-effective than LCR, as determined by cost (including costs of initial and re-hospitalizations, 12 mo follow-up, other care, and safety/adverse events (AEs) and effectiveness per adolescent recovered (defined in AIM 1A and B).

346  
347  
348  
349  
350  
351  
352  
353  
354  
355 **2. Statistical Methods**

356  
357 **2.1. Pool of participants**

358  
359 a. Projected pool of eligible participants and accrual rate: At Stanford, in 2012 there were 295  
360 admissions to the dedicated inpatient eating disorders unit, with approximately 36% of patients meeting  
361 DSM-4 criteria for AN; 100 similar patients were admitted at UCSF. With the broader eligibility criteria  
362 also including DSM-5, we anticipate at least 40% of patients (120 per yr at Stanford and 40 at UCSF)  
363 will be eligible. Of those who are eligible, we estimate that at least 50% will agree to participate and  
364 thus we will not attempt to achieve equal enrollment across sites. We will accrue 3-4 participants per  
365 mo over 3 yr until N=120 is reached and retain 85% of this sample through 12 mo as shown in open  
366 follow-up studies of participants with AN.

367 b. Commitments of Site PIs, Research Teams, and Participants: Both site PIs have successfully  
368 recruited and retained AN participants in research projects and seen them to completion and  
369 publication. Furthermore, co-I Cheng is a faculty biostatistician with extensive experience in clinical  
370 trials. She will lead the DCC, aiming to ensure the trial is designed, executed, and analyzed without  
371 bias. Patient incentives to participate will emphasize the value of their contributions to medical  
372 research and remuneration for their time.

373 c. Data Analyses:

374 **Sample Description**: The study sample will be summarized and described (e.g., mean  $\pm$  SD) by  
375 stratification factor and baseline covariates to confirm general balance by arm and data will be  
376 summarized for completeness of follow-up (e.g., length of stay, last visit).

377  
378 **2.2. Outcomes**

379 The primary analysis of the study adopts a modified intent-to-treat (mITT) approach to compare outcomes  
380 between randomized HCR and LCR participants who received treatment for at least one day. Patients who  
381 are ineligible post randomization, provide no assent after parent's consent, or withdraw before receiving any  
382 treatment, will not be included in the mITT analysis for reasons of data unavailability, ethics and clinical  
383 relevance. Sensitivity analyses will be conducted to check that 1) withdrawal patients are not different from  
384 patients in both groups included in mITT in baseline covariates; and 2) including withdrawal patients in the

385 analyses will not change results and conclusion of mITT analyses. The sensitivity analyses will provide us  
386 reassurance of mITT results.

387  
388 **Aim 1A: Primary (long-term) efficacy outcome.** A (generalized) linear mixed-effects  
389 regression model (GLMM) will compare study arms with respect to achievement and maintenance of  
390 clinical remission. Clinical remission is defined as the combination of mBMI and EDE-Q score at mo  
391 1,3,6,12 (separate analyses below) and measured at 1, 3, 6, and 12 months as 1) clinically remitted (yes  
392 or no) and 2) weight recovered (percent of mBMI). The models will include time, treatment group,  
393 time\*treatment group interaction, and unbalanced baseline covariates if any as fixed  
394 effects, while sites and patients will be included as random effects to account for the correlation due to  
395 clustering. The time\*treatment group interaction provides mITT effect of HCR compared to LCR on  
396 clinical remission over time. The average remission rates and scores and their 95%  
397 confidence intervals (CIs) will be estimated from the model. GLMM accounts for the  
398 fluctuating nature of mBMI and EDE-Q in AN and uses all available data with missing at random  
399 assumption, instead of a stronger assumption of missing completely at random required in other models.  
400 Aim 1 models will be supplemented with secondary analyses: (i) potential moderators at baseline  
401 (included in regression models as main effects and interactions with period and time), may include  
402 DSM-5 criteria and EDE-Q thresholds of risk and (ii) potential mediators at follow-up (included as  
403 time-dependent covariates), may include food recall (DDS and DVS), healthcare utilization, or  
404 incidence of AEs. In addition, separate mixed-effects models will analyze continuous versions of  
405 mBMI and EDE-Q to describe longitudinal trajectories.

406  
407 **Aim 1B: Secondary (short-term) efficacy outcome:** Time to restore and maintain medical stability in  
408 hospital is defined as days to reverse the medical instability indicators for hospitalization in adolescents  
409 with eating disorders. A six-point index will adjudicate daily medical stability: 1.) 24-hour heart rate (HR)  $\geq$   
410 45 bpm, 2.) systolic blood pressure (SBP)  $\geq$  90 mmHg, 3.) temperature  $\geq$  35.6° C, 4.) orthostatic increase  
411 in HR  $\leq$  35 bpm, 5.) orthostatic decrease in systolic BP  $\leq$  20 mmHg, and 6.)  $\geq$  75% of mBMI. Each of the  
412 six criteria were scored as “1” if met, “0” if unmet and missing (not scored) if not measured. Medical  
413 stability was considered restored when all criteria were stable for 24 hours, allowing a maximum of two  
414 missing values (i.e. participants were considered stable if meeting 4 of 4, 5 of 5 or 6 of 6 measured  
415 criteria). All randomized participants who receive at least one day of treatment, including those who  
416 withdraw at any time during the refeeding intervention, will be included in the mITT analysis. Specifically,  
417 survival analysis with log rank test will compare time to achieve medical stability by arm while accounting  
418 for the correlation within sites; participants who do not meet stability criteria by hospital discharge will be  
419 right-censored. In case of any important unbalanced covariate at baseline, Cox proportional hazard ratio  
420 model will be used to control for the potential bias due to the confounder. Additionally efficacy outcomes  
421 will include the proportion achieving medical stability in each arm, change in %mBMI as compared to  
422 baseline, and time to restore HR.

423  
424 **Aim 2. Safety:** Primary indicator of safety will be incidence of the following electrolyte abnormalities  
425 during hospitalization: 2A) hypophosphatemia ( $<3$  mg/dL), 2B) hypomagnesaemia ( $\leq 1.7$  mg/dL), 2C)  
426 hypokalemia ( $< 3.5$  mEq/L). These AEs will be tracked, recorded, reported to the DSMB for monitoring,  
427 and to the IRB and NIH as needed, according to the attached DSMP. Incidence of the electrolyte  
428 abnormalities and proportion receiving supplementation to correct electrolyte abnormalities will be  
429 compared by arm during hospitalization using Fisher’s exact test. Additional safety outcomes: the  
430 proportion receiving electrolyte supplementation during the hospitalization between groups will be  
431 compared with Fisher’s exact test; time to electrolyte nadir will be compared with Wilcoxon rank sum test.

432  
433 **Aim 3. Cost Effectiveness (CE):** A decision tree of treatment costs, AEs, health care utilized  
434 (including rehospitalizations), and remission will compare the CE between the two study arms. The  
435 main CE outcome is incremental cost per additional adolescent remitted. Health care utilization will  
436 be costed using national data sources such as acquisition costs for medications, Kids-HCUP for  
437 hospitalizations, CPT codes for physician visits and mental health visits, and internet-based costs  
438 for lab tests. We will use 2014 US costs and not charges. Indirect costs including missed school  
439 and workdays will be assessed and costed using national estimates of wages and salaries of this

age group from the Bureau of Labor Statistics, in order to estimate loss of leisure time (school) or salary time (work).

We will determine the incremental CE ratio (ICER) as:

$$ICER = \frac{Cost_{LCR} - Cost_{HCR}}{Number\ Recovered_{LCR} - Number\ Recovered_{HCR}}$$

Effectiveness will also be indicated by cost of rehospitalizations avoided (ie, rehospitalizations in LCR-HCR). We will determine the net monetary benefit (NB) of each treatment option as:  $NB = Effectiveness \times Willingness\ To\ Pay\ (WTP) - Cost$ . A positive difference in NB between treatments indicates CE. We will also calculate an acceptability curve to demonstrate how parameter uncertainty affects the likelihood of selecting the optimal treatment at a given WTP threshold. Cost of treatment will be determined by initial hospitalization and 12 mo follow-up costs (not charges) including AEs and rehospitalizations. The HCUMS follow-up survey will assess indirect costs such as lost school and/or work (wages) using national data sources (**see C.2.c.(2)**).

Effectiveness will be determined per aim 1A; ICER will also use time (incremental cost per additional day of recovery time over 12 mo). Cost efficacy will be assessed with short-term outcomes at end of hospitalization. Per Aim 1B, cost-efficacy will be assessed with other short-term outcomes at the end of treatment (hospitalization period). Cost-efficacy will be defined as hospital cost or charges associated with length of stay; group differences will be compared with Wilcoxon rank sum test.

### 2.3. Power and Sample-size Considerations

**Aim 1.** Based on studies of AN remission, **Table 2.A** shows that with N=60 per arm we have 80% power on 2-sided 0.05-level test to detect a 20% difference (8% vs. 28%) if data were cross-sectional ( $\rho=1$ ). Our longitudinal data will allow detection of smaller effects, especially if the correlation among outcomes is low ( $\rho < 0.8$ ). We anticipate 85% retention and non-differential dropout by arm. Since **time to medical stability** is also expected to differ by at least 12% (**Table 2.B.**), we will be adequately powered for Aim 1B.

**Table 2.A Detectable differences in remission-rates:**

| $\rho^*$ | LCR | HCR | Mo--3 Diff |
|----------|-----|-----|------------|
| 1.0      | 8%  | 28% | 20%        |
| 0.8      | 14% | 34% | 20%        |
| 0.6      | 16% | 34% | 18%        |
| 0.4      | 18% | 34% | 16%        |
| 0.2      | 20% | 34% | 14%        |
| 0.1      | 22% | 34% | 12%        |

### 2.4. Data Management

**a. DCC:** Dr. Cheng at UCSF will lead the DCC, which will be autonomous and independent of the clinical sites. It is housed in the UCSF Department of Preventive and Restorative Dental Sciences (PRDS). The department is staffed primarily by statisticians and scientific researchers who conduct data-intensive research, collaborative data collection and analyses from multiple sites. They are equipped with an independent network of sophisticated and reliable computer systems with high-level security for protecting health information. The network is maintained by an in-house computer staff, which manages all aspects of the network, including ongoing maintenance, installation and upgrades of hardware, software and structural components such as cabling and servers. Dr. Cheng is the lead biostatistician and routinely guides the work of Master-level statisticians, data managers and programmers. **Dr. Cheng** will continue as faculty biostatistician and DCC leader. She has extensive experience running NIDCR-funded DCCs for clinical trials with more than 8-10 sites nationwide. Thus, UCSF has experience maintaining a distinctly separate but closely coordinated working relationship between clinical sites and data center.

**Table 2.B. Detectable differences in time to medical stability-rates**

| $\rho^*$ | LCR | HCR | Difference |
|----------|-----|-----|------------|
| 1.0      | 72% | 92% | 20%        |
| 0.8      | 66% | 86% | 20%        |
| 0.6      | 66% | 84% | 18%        |
| 0.4      | 66% | 82% | 16%        |
| 0.2      | 66% | 80% | 14%        |
| 0.1      | 66% | 78% | 12%        |

\*correlation among 5 time points within participant

493  
494  
495  
496  
497  
498  
499  
500  
501  
502  
503  
504  
505  
506  
507  
508  
509  
510  
511  
512  
513  
514  
515  
516  
517  
518  
519  
520  
521  
522

- b. Electronic data capture: Both clinical sites are equipped with the same Research Electronic Data Capture (Qualtrics) system for databases, data entry forms, online questionnaires and data validation. Data will be automatically exported to STATA or SAS for analysis using The Data Export Utility. The DCC uses advanced features including branching logic for dynamic data entry form generation, file uploading, data importing, and embedded calculated database fields.
- c. Confidentiality: Loss of confidentiality is a recognized risk of participating in clinical research since protected health information, medical history, and demographics are used for the study. Loss of privacy may lead to problems with insurability or social stigmatization. We will make effort to minimize this risk and have systems in place to ensure confidentiality. Data will be de-identified and thereafter handled by ID number, rather than by name. No publications will include the names of patients or identifying information about study participants.

## 2.5. Retention and Attrition

We expect to retain 85% of our sample through one year of follow-up. This is consistent with other open follow-up studies of AN and feasible given our patients volumes and return rates. We will actively retain participants by providing incentives: movie tickets upon enrollment and a \$50 for every follow-up visit attended. Primary analyses will use intent-to-treat longitudinal models that will include outcomes from randomization through the time of dropout or 12 mo, whichever is longer. Secondary analyses will adjust models for baseline covariates that may be associated with loss to follow-up. We anticipate very few missing outcomes because weight and vital sign (medical stability) measures are SOC in AN care during hospital and at follow-up and the majority of patients hospitalized at our programs return to us for follow-up care. Reasons for refusal to participate will be collected from patients and families who decline enrollment.

523  
524  
525  
526  
527  
528  
529  
530  
531

## APPENDIX

### MULTI-CENTER RANDOMIZED CONTROLLED TRIAL OF REFEEDING IN ANOREXIA NERVOSA: The Study of Refeeding to Optimize iNpatient Gains (StRONG)

**Appendix Table 1.** Amendments to the Protocol

| Protocol version | Section changed             | Amendment description & reason                                                                                                                                                                                                                                                            | IRB approval and/or other documentation date                                                          |
|------------------|-----------------------------|-------------------------------------------------------------------------------------------------------------------------------------------------------------------------------------------------------------------------------------------------------------------------------------------|-------------------------------------------------------------------------------------------------------|
| 1.1              | 3.1 Treatment and Follow-up | Oral nutrition supplement to replace refused food contains 1.5 kcal/mL; previously listed as 1.06 kcal/mL, to reflect actual clinical practice                                                                                                                                            | IRB approved 12/01/2015<br><br>Posted on clinicaltrials.gov 05/12/2016                                |
|                  | 3.1 Treatment and Follow-up | Electrolyte replacement protocol developed for more severe levels of low serum electrolytes                                                                                                                                                                                               |                                                                                                       |
|                  | 3.1 Treatment and follow-up | Nutrition intake is assessed via 24-hour recalls at each follow-up time point to reduce participant burden                                                                                                                                                                                |                                                                                                       |
|                  | 2.1 Study Population        | Added one exclusion criterion: extremely malnourished patients, admitted with mBMI <60%, will no longer be eligible to enroll in the study, as they are at higher risk of medical decompensation.                                                                                         |                                                                                                       |
|                  | 3.1 Treatment and follow-up | Follow-up visits will be defined as time since discharge instead of time since admission. This will ensure that time elapsed will be comparable among participants despite differing lengths of admission.                                                                                |                                                                                                       |
| 1.2              | 3.2 Data Collection         | Self-reported EDE-Q (5-10 minutes) will replace the lengthy interview-based EDE (60-90 minutes), based on recent evidence that it serves as a valid proxy for measuring severity of eating disorder psychopathology, with significant reduction in participant burden and personnel cost. | IRB approved 01/05/2016<br>NIH in progress report 05/08/16<br>Posted on Clinicaltrials.gov 05/12/2016 |
|                  | 2.1 Study Population        | Eligibility criteria updated to reflect actual clinical practice: to be eligible for participation, orthostatic increase HR from lying to standing of 35 bpm                                                                                                                              |                                                                                                       |
| 1.3              | 3.1 Treatment and follow-up | Discharge criteria based on SBP only, not DBP                                                                                                                                                                                                                                             | IRB approved 05/19/2017                                                                               |

532  
533  
534

535  
536  
537  
538

**Appendix Table 2.** Amendments to the Statistical Analysis Plan\*  
\* All amendments were made and documented prior to locking of database for analysis

| Section changed | Amendment description & rationale                                                                                                                                                                                                                                                                                                                                                                                                                                                                                                                                                                                                                                                                                                                                                                                                                                                                                                                                                                                                                            | Amendment date & documentation                        |
|-----------------|--------------------------------------------------------------------------------------------------------------------------------------------------------------------------------------------------------------------------------------------------------------------------------------------------------------------------------------------------------------------------------------------------------------------------------------------------------------------------------------------------------------------------------------------------------------------------------------------------------------------------------------------------------------------------------------------------------------------------------------------------------------------------------------------------------------------------------------------------------------------------------------------------------------------------------------------------------------------------------------------------------------------------------------------------------------|-------------------------------------------------------|
| 2.2 Outcomes    | <p><b>Amendment 1: End-point for AIM 1B shortened to in hospital treatment period</b></p> <p><b>Rationale:</b> To match the timeframe for the safety outcome and to better capture the efficacy of this relatively short intervention (less than 2 weeks in hospital) within a long, open follow-up trial. Further, to allow timely dissemination of findings. [Citation: IOM guideline, <i>Sharing Clinical Trial Data: Maximizing Benefits, Minimizing Risk</i>, pg 118: Investigators “may publish the primary trial endpoints despite ongoing longer-term participant follow-up; in this case, the last participant’s last visit may not occur for some time, and hence the full analyzable data set may not be complete at the time of the original publication.”]</p> <p>Timeframe for AIM 1B specified as 2 weeks and posted on clinicaltrials.gov</p> <p>Project officer, Dr. Karen Winer approved analysis of short-term (in-hospital) outcomes by arm (DSMB notified 7/03/19, randomization code was broken)</p> <p>Short-term database locked</p> | <p>06/30/2015</p> <p>05/26/2019</p> <p>07/31/2019</p> |
| 2.2 Outcomes    | <p><b>Amendment 2: Analytic approach for AIM 1B changed from mixed effects regression modeling to survival analysis</b></p> <p><b>Rationale:</b> survival analysis chosen to examine time to restore medical stability in hospital (amended AIM 1B), rather than mixed effects regression modeling to examine medical stability over 12-month follow-up. This is a more appropriate approach to assess “time to” outcome, which accounts for the variable lengths of hospital stay and allows participants who were discharged before medical stability was restored to be right-censored.</p> <p>Change in “time to” analysis documented in NIH Progress Report</p> <p>Data Coordination Center documented decision to use survival analyses for AIM 1B</p>                                                                                                                                                                                                                                                                                                 | <p>05/05/2017</p> <p>10/17/2017</p>                   |
| 2.2 Outcomes    | <p><b>Amendment 3: Analytic approach for AIM 2 (safety) changed from Cox regression modeling to basic non-parametric testing</b></p> <p><b>Rationale:</b> Originally planned approach (Cox regression models) assumed high incidence electrolyte abnormalities based on prior studies reporting rates up to 48%. However, ongoing AE monitoring during the trial revealed very low incidence and therefore basic parametric methods were chosen to allow clinical interpretation of the results.</p> <p>DSMB reports since 2017 (signed by DSMB members and sent to POs, Dr. Graves and Dr. Winer)</p>                                                                                                                                                                                                                                                                                                                                                                                                                                                       | <p>02/17/2017</p> <p>02/20/2018</p> <p>02/15/2019</p> |

539

## RESEARCH STRATEGY

### I. SPECIFIC AIMS

Anorexia nervosa (AN) is an illness commonly diagnosed in adolescence with low recovery rates and high healthcare costs. The major medical complication of AN is malnutrition. Caloric restriction, purging and other weight control behaviors can lead to medical instability (abnormal vital signs) requiring hospitalization. The primary goal of hospitalization is to restore medical stability by reintroducing nutrition, or “refeeding” [1, 2]. Within 12 mo of discharge, 43% [3] of patients will require medical rehospitalization. This contributes to a costly course of recovery, given that eating disorders are the most expensive primary mental health diagnoses requiring hospitalization [4]. Several lines of inquiry seeking to identify characteristics or short-term outcomes that may predict better recovery from AN point to rapid short-term weight gain as a strong predictor of long-term outcomes. Greater weight gain in hospital predicts weight recovery at 12 mo [5-7] and greater weight gain during the first 3-4 wk of psychotherapy (1.7-1.9 lb/wk) predicts full remission at 12 mo [8]. Unfortunately, the currently recommended approach, Lower Calorie Refeeding (LCR), is associated with slow weight gain and prolonged hospital stay. Treatment is now moving sporadically toward Higher Calorie Refeeding (HCR) in the hope of improved recovery but with insufficient evidence to guide best practices.

Refeeding has been approached with extreme caution since the refeeding syndrome, characterized by rapid electrolyte shifts, delirium and cardiac arrest in response to the influx of nutrients was first described around WWII [9, 10]. Following documentation of this syndrome in patients with AN [11-15], conservative, consensus-based recommendations for LCR were developed [16-18]. LCR typically begins around 1200 kilocalories (kcal) per day and advances by 200 kcal every other day [16-18]. Our preliminary studies demonstrating that the long-standing clinical observation of initial weight loss and long hospital stay was associated with lower starting calorie levels [19] have contributed to recognition of the “underfeeding syndrome” [15]. In subsequent studies, we reported that HCR produced faster weight gain and shorter hospitalization [20, 21]. While no increased risk of refeeding syndrome has been reported using HCR, the variety of electrolyte supplementation protocols being used to manage risk have not been examined [22].

Findings from these observational and retrospective studies are being rapidly accepted by many clinicians and insurers, and some programs are integrating HCR into practice. However, there are major gaps in the evidence necessary to adopt HCR as the new standard of care: 1.) It is not known if HCR impacts clinical remission, which is typically defined as the combination of weight *and* cognitive recovery at 12 mo. 2.) The safety of HCR has not been confirmed. While examination of the full spectrum of the refeeding syndrome (including the rare occurrence of death) would require a large trial, the hallmark electrolyte imbalances occur frequently and still have not been systematically examined on differing refeeding protocols. 3.) The shorter hospital stay associated with HCR is of great interest to clinicians, families and insurers hoping to contain healthcare costs, however the true cost-effectiveness (cost in relation to recovery) must be explored.

We propose to conduct a randomized controlled trial (RCT) at two sites to directly compare HCR and LCR for refeeding in AN. To accomplish the following aims, 120 adolescents will be enrolled upon admission to hospital for malnutrition secondary to AN and randomized 1:1 to HCR (beginning with 2000 kcal and advanced 200 kcal/d) or LCR (beginning at 1400 kcal/d and advanced 200 kcal every other day) until medical stability is restored. Participants will be followed for 12 mo after randomization: Daily while in hospital and at follow-up 10 dy, 1 mo, 3 mo, 6 mo, and 12 mo after randomization. These findings will contribute to the development of evidenced-based refeeding approaches in AN.

**Our study has three main aims. We will compare:**

**1: Efficacy** of LCR vs. HCR over 12-mo follow-up. We hypothesize that LCR and HCR will differ by *achievement and maintenance of*: (1A) clinical remission during 12 mo follow-up, defined by achievement of both-(i) weight  $\geq$  95% median BMI (MBMI) for age and sex, and (ii) Eating Disorder Examination (EDE) global score within 1 SD of clinical norm [20], and (1B) medical stability during 12 mo follow-up defined by published vital sign thresholds [23].

**2: Safety** of LCR vs. HCR during initial hospitalization. We hypothesize that LCR and HCR will *not* differ by *incidence of*: 2A) hypophosphatemia ( $\leq$ 3 mg/dL), 2B) hypomagnesaemia ( $\leq$ 1.7 mg/dL), and 2C) hypokalemia ( $\leq$ 3.5 mEq/L).

**3: Cost-effectiveness (CE)** of LCR vs. HCR. We hypothesize that HCR will be more cost-effective than LCR, as determined by cost (including costs of initial and re-hospitalizations, 12 mo follow-up, other care, and safety/adverse events (AEs) and effectiveness per adolescent recovered (defined in AIM 1A and B).



## II. SIGNIFICANCE

**II.A. Overview:** AN is the most deadly psychiatric illness, in part because it results in malnutrition and acute medical sequelae. The mortality rate has been estimated as high as 5.0% [24] and rates of clinical remission are low, ranging from 18-55% [24]. Diagnoses of AN are expected to increase [25] with the fifth edition of the Diagnostic and Statistical Manual (DSM-5). The criteria for diagnosing AN are now more inclusive: amenorrhea and weight below 85% of expected are no longer required, while a new diagnosis of atypical AN will include the growing number of formerly overweight patients who present with malnutrition due to weight loss. In addition to more boys being diagnosed [25], the population who meet criteria for atypical AN is more racially/ethnically diverse and has increased an estimated 5-fold in the past 6 years [26]. The growing prevalence and changing face of AN underscore the need to develop effective treatments.

Malnutrition due to caloric restriction, excessive exercise and other dieting behaviors, can quickly result in medical instability, even in young people who were recently healthy and well nourished. The abnormal vital signs defining medical instability were recently updated [27] as follows: bradycardia (daytime heart rate (HR) < 50 bpm or night time HR < 45 bpm), hypotension (BP <90/45 mmHg), hypothermia (< 36° C) and orthostasis (increase in HR > 20 bpm or decrease in systolic BP > 20 mmHg or decrease in diastolic BP > 10 mmHg from lying to standing). In such cases, hospital admission, bed rest and a prescribed diet for refeeding are recommended. Medical stability is typically restored within a few weeks [1] and patients leave hospital with a long road to recovery ahead; 43% will require additional hospitalization in the first year [3]. Return of menses may take more than nine months after hospital discharge and typically occurs at a weight corresponding to 95% MBMI [28, 29]. However, eating disorder cognitions (such as distorted body image) can remain powerful at “normal” weight; therefore clinical remission is defined as weight and cognitive recovery together [30].

Greater weight gain in hospital and during early treatment (the first 4 weeks) predicts of weight recovery [5-7] and clinical remission [8] at 12 mo. Unfortunately, slow weight gain and prolonged hospital stay became part of the expected course for AN [31] in the decades since LCR has been the standard of care in AN. The American Psychiatric Association [16, 17], the Academy of Nutrition and Dietetics [18] and others [32] recommend starting around 1200 kcal per day and advancing slowly by about 200 kcal every other day. The resulting slow weight gain was formerly attributed to fluid shifts [33, 34] and changes in metabolic rate [35]. Our 2012 study at the University of California San Francisco (UCSF) was the first to demonstrate that it was associated with lower starting calorie levels [19]. These findings contributed to the recent recognition of the “underfeeding syndrome”, characterized by prolonged illness and even death due to overly cautious refeeding [15].

The original intent of the “start low and go slow” LCR approach was to minimize risk for the refeeding syndrome. The clinical features of this syndrome include cardiac arrhythmias, cardiac failure or arrest, muscle weakness, hemolytic anemia, delirium, seizures, coma, and sudden death [36]. Risk is highest in the first seven days [2] when refeeding is initiated in a starved individual. The insulin surge in response to the influx of nutrients (particularly carbohydrate) causes a massive shift in electrolytes and fluids from the extra- to the intracellular space as the cells take up glucose. The hallmark feature is hypophosphatemia ( $\leq 3$  mg/dL [2]), however hypomagnesaemia ( $\leq 1.7$  mg/dL) and hypokalemia (potassium  $\leq 3.5$  mEq/L) may also occur [21]. Since it was first described around WWII [9, 10], the refeeding syndrome was documented in patients with AN [11-15] and LCR has been used broadly to ensure safety.

Our subsequent studies at UCSF and Stanford University suggest that HCR is feasible to improve outcomes in hospital (**see Table 1**). At UCSF, our prospective observational study of 56 adolescents hospitalized with AN followed daily in the Pediatric Clinical Research Center found nearly double the rate of weight gain and almost six days shorter hospitalization in a group starting at 1775 kcal/d on average as compared to those starting around 1165 kcal/d [20]. At Stanford, our large retrospective study of 310 adolescents compared two groups starting at an average of 1550 vs. 1165 kcal/d and found more than 3 days shorter hospital stay [21]. These preliminary findings are being rapidly translated into practice. However, without sufficient evidence to guide best practices, a wide variety of HCR approaches are being implemented. For example, differing rates of caloric advancement might explain why we found faster rates of weight gain in our UCSF study but not Stanford. There is also wide variation method of delivery of HCR: meal-based approaches are preferred in the U.S [20, 21], whereas enteral (tube) feeding is reported in Europe [37-39] and Australia [40]. Our programs use meal-based HCR, where food is served on bedside trays, formula is given orally only as needed to replace refused foods, and enteral feeding is reserved as a last resort.

103 As clinical practice moves toward with HCR in various forms, the questions of safety and long-term outcomes  
104 are paramount. A large, nationwide trial would be required to examine the full range of clinical features  
105 associated with the refeeding syndrome: only a handful of cases of cardiac arrest and death have been  
106 reported in the AN literature [12, 41, 42]. Research to date has focused on the associated electrolyte  
107 disturbances and the proposed study will build on this. It is difficult to interpret the available data on electrolyte  
108 abnormalities during HCR [20, 21, 43, 44] because a wide variety of approaches are being used to treat them  
109 [22]. Some programs initiate prophylactic phosphate supplementation when HCR commences, whereas  
110 another program reported that only 1 of 30 patients required electrolyte replacement for low phosphorus [44].  
111 Our programs at UCSF and Stanford are using electrolyte replacement to treat low and/or declining serum  
112 phosphorus [22]. Using this method, the Stanford study observed an overall rate of 15.8% hypophosphatemia,  
113 with no differences in rates of hypophosphatemia, hypomagnesemia or hypokalemia between HCR and LCR  
114 groups. At UCSF, we also reported no differences in electrolyte abnormalities with 36% of participants  
115 receiving electrolyte replacement [20]. This overall rate similar is similar to other programs [43], but it appeared  
116 as though more HCR participants received electrolyte replacement than LCR (43 vs. 28%), suggesting  
117 systematic bias [20]. Thus, we cannot determine whether there are differences in electrolyte abnormalities  
118 based on caloric level. The proposed study will answer this questions using a standardized electrolyte  
119 monitoring and replacement protocol (**see B.4.c.**), which will be identical between study groups and sites.

120 The long-term impact of HCR is unknown and this prevents weighing the possible benefits against any  
121 potential risks. In preliminary data from our current project (1R03HD077421-01), weight recovery at 12 mo  
122 appears slightly better in HCR than LCR (**see IV.A.2.b**). However, the retrospective chart review data and  
123 small sample size prevent us from determining whether this apparent difference is clinically significant and how  
124 much is attributable to differing body weights at baseline. Selection bias is also possible, as HCR may have  
125 been prescribed to heavier patients. The proposed study will address these caveats with a randomized,  
126 prospective design. A second unanswered question arises from studies reporting increased anxiety and stress  
127 in proportion to calorie load in AN patients [45-48]. These findings have prompted some clinicians to ask  
128 whether HCR could actually *impede* cognitive recovery. Will examine this potential unintended consequence  
129 as part of our primary aim; such a finding would lay groundwork to explore mechanisms (such as meal-time  
130 stress) in future studies. Finally, rehospitalization rates warrant further examination. In our preliminary data the  
131 LCR group appears to spend more time rehospitalized, which is consistent with findings from the only RCT of  
132 refeeding in AN to date. Rigaud et al. compared higher calorie tube feeding (N=41) to lower calorie meal-based  
133 refeeding (N=40) and found sooner rehospitalization in the meal group with no differences in weight at 12 mo  
134 [38]. The nasogastric method of delivery, adult study population and long hospitalization (2 mo) prevent direct  
135 comparison, but this study provides support for our hypothesis that LCR will result greater rates of relapse.

136 AEs and/or medical instability requiring rehospitalization for additional rounds of refeeding contribute to the  
137 high healthcare costs of AN. Indeed, eating disorders are the most expensive diagnosis among the recognized  
138 “common and costly” primary mental health diagnoses in pediatrics [4], with an average charge of \$46,130 per  
139 hospitalization. Of course, the true “cost” of AN reaches far beyond the hospital bill into the life of the affected  
140 adolescent. The full episode of care includes both the direct cost of initial hospital stay and rehospitalizations  
141 (including emergency room visits) as well as the indirect costs such as days missed at school and work. The  
142 proposed study will compare the cost per adolescent recovered on HCR and LCR using a decision tree of  
143 treatment costs including AEs, rehospitalizations, and recovery outcomes. This comprehensive examination of  
144 CE is novel in the field of AN and much needed to weigh difficult treatment decisions.

145 **II.B. Conclusions:** Balancing the potential risks of the refeeding syndrome with the need to maximize weight  
146 gain during refeeding in hospitalized patients with AN represents a fundamental paradox for clinical practice.  
147 While the conservative recommendations for lower calorie diets minimize refeeding risk, they also contribute to  
148 the underfeeding syndrome. Our preliminary studies indicate that HCR is feasible and beneficial in hospital,  
149 however no studies have directly compared the long-term efficacy and safety of the two approaches. This RCT  
150 is the next essential next step to building evidence-based approaches to refeeding.

### III. INNOVATION

151 The field of AN is poised to make major shift in clinical practice in light of recent evidence that LCR, the  
152 cautious approach to refeeding used since WWII, may actually thwart recovery. Clinicians are eager to  
153 implement better approaches but there is little evidence to guide clinical practice. Thus, the timing of this  
154 proposal is ideal for rapid translation. First, this would be the first RCT to compare HCR and LCR in  
155 adolescents with AN. We are proposing to utilize two study sites to maximize sample size in this relatively rare

illness and answer the research questions in a timely manner. Second, our geographic location, diverse patient populations and inclusion of the new DSM-5 diagnosis of atypical AN will result in a study sample that is more diverse in race/ethnicity and sex (boys). Studies of AN traditionally been limited in diversity because the presenting population is mostly White girls [49]. Third, the investigators at both sites have contributed heavily to the science leading up to this proposal and we have established clinical research protocols that can be reliably disseminated at both sites. The fourth innovative aspect of the proposed study is the interdisciplinary nature: we plan to explore the relationship between nutritional rehabilitation and medical and psychological recovery, areas that are too often studied separately. Finally, the proposed examination of CE is novel in the field of AN and will generate crucial information for clinicians, adolescents and their families, making care decisions in the wake of a “common and costly” diagnosis with known poor recovery.

#### IV. APPROACH

##### A. Preliminary Studies

##### A.1. Evidence for the underfeeding syndrome

a. The “stabilization” phase: Solanto & Golden (1994) were first to publish daily weight gain trajectories in AN participants showing initial weight loss on LCR [31]. The purpose of this study was to assess rate of weight gain under two behavioral contracts differing in the amount of weight gain required (0.8 lb vs. 1.2 lb in 4 days) to increase privileges (e.g. telephone). Refeeding was initiated on LCR at 1000-1200 kcals/d. In the 53 female adolescents aged 9-23 years with AN who met inclusion criteria, rate of weight gain increased in the HC group (contract 2) but in both groups there was a 5-7 day “stabilization phase” during which weight initially dropped. This study was important as it provided the first documentation of the long-standing clinical observation of initial weight loss in hospitalized AN patients.

b. The association between initial weight loss, long hospital stay and LCR [19]: SHAAN was an observational study with data collected prospectively throughout the course of hospitalization. This project began at UCSF in 2002 funded by the CTSI (UL1 RR024131, PI Garber, Co-I Moscicki). Adolescents with diagnosed AN ages 9-20 years and no previous hospital admissions for AN were enrolled upon hospital admission for medical stabilization. Participants were moderately malnourished with a mean BMI of 16.1(0.3) kg/m<sup>2</sup>, bradycardic and hypothermic [50]. Thirty-five participants enrolled 2002-2009 and refeed starting between 800-2200 kcal/d with a mean (SEM) of 1205(289) kcal (consistent with LCR). Calorie prescriptions increased to 2668(387) over 17 days. No participants had clinical symptoms of the refeeding syndrome; 20% had low serum phosphorus ( $\leq 3.0$  mg/dL). %MBMI increased from 80.1(11.5) to 84.5(9.6); overall gain was 2.10(1.98) Kg. Paired t-tests compared daily change in %MBMI.

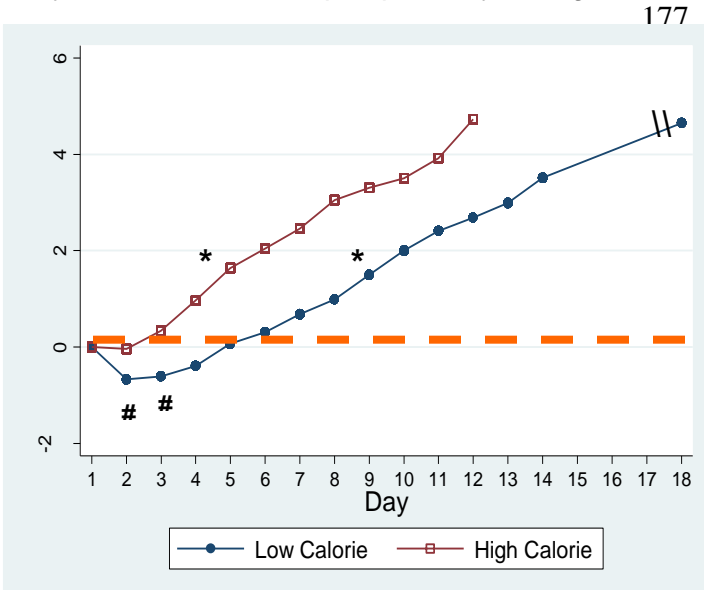

Figure 1: Change in %MBMI on LCR vs. HCR

--- baseline %MBMI calculated from Day 1 height and weight  
 # Day 2 and Day 3 significantly lower than Day 1 ( $p < 0.05$ ).  
 \* significantly greater than Day 1 (all  $p < 0.05$ )

higher kcal was associated with faster weight gain ( $\beta = 0.0002$ ; 95% CI 0.0001, 0.0005;  $p=0.016$ ) and shorter hospital stay ( $\beta = -0.0092$ ; 95% CI -0.0152, -0.0008;  $p=0.013$ ). For every 100-calorie increase in prescription at baseline, rate of %MBMI gain increased 0.02% per day and stay days decrease 0.9 days. This is called the “underfeeding study” because it demonstrated the association between LCR, poor weight gain and long stay in hospitalized adolescents with AN.

##### A.2. Evidence for Higher Calorie Meal-Based Refeeding

a. Time to achieve weight gain and medical stabilization HCR: Our programs and others began increasing calorie prescriptions in response to the studies above and other reports of higher calorie approaches to refeeding in AN [40, 43]. This shift in clinical practice created an experimental opportunity to compare the two

approaches. We enrolled new participants in SHAAN from 2009-12 refed on HCR (N=28) and utilized our former study participants on LCR (N=28) as historical controls. HCR began at mean (SEM) of 1764(60) kcal, LCR began at 1093(28) kcal (p<0.001). Unpaired t-tests between groups showed no differences in %MBMI, age, HR, temperature or hydration upon admission. HCR advanced more quickly (p=0.024) and were 250 kcal greater upon discharge (p=0.015). There were no differences in serum phosphorus, however more HCR participants were supplemented (12/28 (43%) vs. 8/28 (29%), p=0.273). Weight gain trajectories are shown in **Fig 1**. No average weight loss was observed in HCR. Rate of weight gain was double in HCR: 0.46(0.04) vs. 0.26(0.03) %MBMI per day in the, or 0.27(0.03) vs. 0.14(0.02) kg per day (p<0.001). Average hospital stay was 5.7 days shorter (p<0.001) in HCR; therefore there was no difference in %MBMI at discharge (p=0.173). We found shorter hospital stay, faster weight gain with no increased evidence of risk of the refeeding syndrome (using phosphate supplementation) on HCR compared to LCR. However, this study is limited as an observational study of clinical practice: the sample size was relatively small, feeding groups were not rigorously defined and supplementation was varied.

**b. Safety of HCR in large retrospective study:** Safety was, and remains, the major consideration in HCR. At Stanford we retrospectively reviewed the electronic medical records in all participants 10-21 years old with AN who were hospitalized for the first time in our program between Jan 2007 to Dec 2011 to compare weight gain, length of stay and prevalence of hypophosphatemia, hypomagnesemia, and hypokalemia of LCR and HCR [21]. Hypophosphatemia was defined as  $\leq 3.0$  mg/dL, hypomagnesemia as  $\leq 1.7$  mg/dL, and hypokalemia  $\leq 3.5$  mEq/L. LCR included all participants starting on <1,400 kcal/d and HCR started  $\geq 1,400$  kcal/d, with 95% of subjects in the HC group starting on 1400-2000 kcal/d.

The characteristics of these 310 participants are shown in **Table 1**. Mean starting kcal in LCR vs. HCR were 1,163(107) and 1,557(265) kcal/d. With these calorie groups, we did not find initial weight loss or differences in rate of weight gain, however days in hospital was significantly reduced in HCR [13.0(7.3) vs. 16.6(9.0) d; p < .0001]. Regarding safety, we found no differences in rates of hypophosphatemia (p=0.49), hypomagnesemia (p=1.0) or hypokalemia (p=0.35) between groups. Hypophosphatemia was associated with %MBMI on admission (p=0.004), consistent with our previous studies, but not caloric intake (p=0.14). Importantly, results were similar when we restricted the analysis to N=49 severely malnourished participants (MBMI < 70%). These findings provide further support for HCR and suggest that it is feasible even for those with severe malnutrition.

**c. Long-term follow-up of SHAAN participants refed on LCR vs. HCR:** There are currently no published long-term data on meal-based refeeding. Our current project (1R03HD077421-01, PI Garber, Co-I Moscicki, co-I and lead biostatistician Hilton) is examining outcomes for one-year after hospital discharge in our SHAAN

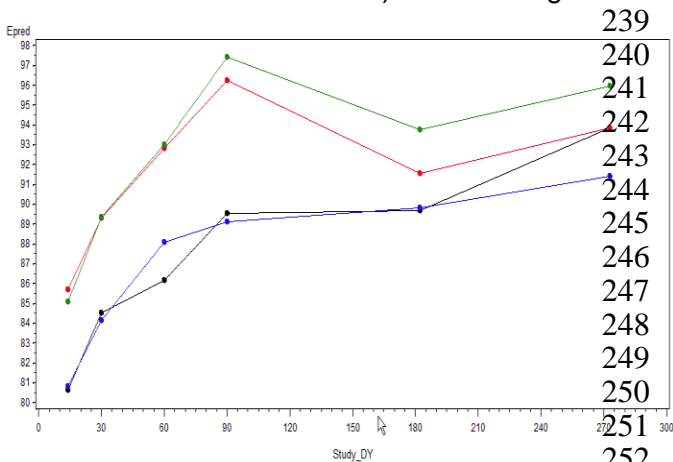

**Figure 2: Change in %MBMI by start calorie prescription quartile (1000 black, 1200 blue, 1400 red, green 2000)**

participants. Our hypothesis is that HCR would lead to earlier hospital discharge without negative effects; specifically no greater rate of rehospitalization. We are submitting the results for publication. Weight gain trajectories for study groups defined by Day 1 calories (1000, 1200, 1400 and 2000) are shown in **Fig 2**. These retrospective data show no differences in weight recovery between groups, with more total days in hospital for LCR participants. Including initial stay and rehospitalizations for AN, LCR participants (starting at 1000 or 1200 calories) spent more than 9 additional days in hospital over 12 mo follow-up (p=0.035). The implication of this finding, that the high cost of additional hospital time confers no advantage in long-term weight recovery, will be tested in the proposed study.

**A.3. Summary of preliminary findings:** These studies strongly support the notion that LCR contributes to underfeeding, whereas HCR safely speeds weight gain and shortens hospital stay in moderately malnourished patients with AN. However, these data are observational and subject to clinical bias: diets were implemented and electrolytes were prescribed based on clinical judgment. The proposed study, with randomization to defined HCR and LCR with protocolized electrolyte monitoring and replacement, will contribute to evidenced-based recommendations for refeeding in AN.

## B. Proposed Study

Current recommendations to guide the clinical care of AN patients hospitalized with medical instability due to

malnutrition are based solely on retrospective or observational studies and/or clinical experience. No studies to date have prospectively tested HCR and the long-term impact on recovery is unknown. Consensus has developed over recent decades that patient safety can only be guaranteed using LCR. The entrenchment of clinical practice without supporting evidence is a widely recognized dilemma in healthcare [51]. While RCTs are considered the “gold standard” to establish evidence-based medicine, until recently there was insufficient data to propose such a study of refeeding in AN. We now have preliminary findings to indicate that LCR might be too cautious and that HCR appears feasible and may improve long-term recovery. Thus, we are poised to compare these two treatments in a parallel, randomized fashion.

**B.1. Study Design:** The purpose of this multi-center randomized controlled trial is to compare LCR vs. HCR refeeding strategies for hospitalized adolescents with AN. Participants will be recruited upon hospital admission at two centers (UCSF and Stanford) to maximize sample size, and randomly assigned 1:1 within site to one of the two strategies. A total of 120 participants age 12-24 yrs who meet DSM-5 diagnostic criteria for AN and atypical AN (see IV.B.2.), and present as medically unstable due to malnutrition will be enrolled. Treatments will not be blinded, since both the patients and clinicians who work with this population are highly skilled at estimating kcal and would be able to determine their group assignment by simply viewing the meal trays. In addition, target kcal will be reached faster in HCR and this would be apparent on physician orders. An important exception is the research assistant collecting the EDE, who will be blinded so as not to bias the interview. The proposed study is powered to detect a meaningful difference in clinical remission (Aim 1).

**B.2. Study population:** We will expand inclusion criteria from previous studies to capture a broader representation of patients by including diagnoses of AN and atypical AN as per the new DSM-5 and including participants with multiple admissions.

**a. Inclusion/Exclusion:** Adolescents hospitalized for medical instability secondary to malnutrition will be eligible as follows. Inclusion criteria: diagnosis of AN, atypical AN [52], age 12-24 years, no hospital admissions for the previous six months, and meet hospitalization criteria (daytime HR < 50 bpm or night time HR < 45 bpm, BP <90/45 mmHg, temperature < 36° C or orthostasis defined by increase in HR > 20 bpm or decrease in systolic BP > 20 mmHg or decrease in diastolic BP > 10 mmHg from lying to standing) [27]. Exclusion criteria: diagnosis of bulimia nervosa [DSM-5], currently in remission (as defined by weight and EDE score per Aim 1), admission for food refusal without malnutrition, current pregnancy, chronic disease (e.g. immune/endocrine disorders, pulmonary, cardiac, or renal disease), current suicidality or psychosis.

Both of our programs draw patients from the Bay Area, a highly diverse region including several major metropolitan areas (e.g. San Francisco, Santa Rosa, San Jose, Fresno and Sacramento). At UCSF, 31% of our patients self-describe as “non-White”, within this group is 47% non-White Hispanic, 5% Black, 24% Asian and 24% Other, and 37% of these patients have public insurance. At Stanford, the clinic population is 18% non-White. By comparison, 87.6% of the patient population with AN is White across a national sample of 14 programs [53].

**Table 1: Comparison of historical AN study populations by site and refeeding strategy**

| Demographic and clinical features | Stanford (N=310) [21] |             |         | UCSF (N=56) [19] |             |         |
|-----------------------------------|-----------------------|-------------|---------|------------------|-------------|---------|
|                                   | LCR (N=88)            | HCR (N=222) | P-val ^ | LCR (N=28)       | HCR (N=28)  | P-val ^ |
| <i>Baseline</i>                   |                       |             |         |                  |             |         |
| 1 Age, yr                         | 16.2 (2.4)            | 16.1 (2.3)  | .69     | 16.2 (2.1)       | 16.1 (2.4)  | .88     |
| 2 Admit BMI, kg/m <sup>2</sup>    | 15.9 (2.2)            | 16.1 (1.7)  | .48     | 15.8 (2.5)       | 16.6 (2.1)  | .19     |
| 3 Admit %MBMI                     | 77.9 (9.6)            | 78.7 (7.8)  | .44     | 77.6 (12.1)      | 81.9 (9.5)  | .15     |
| 4 Initial prescribed kcal         | 1,163 (107)           | 1,557 (265) | <.001   | 1,093 (149)      | 1,764 (318) | .000    |
| <i>Follow-up</i>                  |                       |             |         |                  |             |         |
| 5 Length of stay, days            | 16.6 (9.0)            | 13.0 (7.3)  | .000    | 17.6 (6.52)      | 11.9 (5.41) | .000    |
| 6 Discharge %MBMI                 | 84.3 (8.2)            | 83.7 (6.9)  | .54     | 82.3 (9.7)       | 85.7(8.6)   | .17     |
| 7 Rate of chg %MBMI (wk1)         | 0.57 (.30)            | 0.55 (.37)  | .50     | 0.26 (.17)       | 0.46 (.22)  | <.001   |
| 8 Weight gain, kg                 | 3.6 (2.3)             | 2.9 (1.9)   | .01     | 2.49 (2.0)       | 2.74 (1.5)  | .60     |
| 9 Discharge kcal                  | 2,531 (608)           | 2,560 (598) | .70     | 2,642 (404)      | 2,893 (338) | .02     |

Values are means (SD); ^ P-value from unpaired t-test between LCR and HCR groups

Our programs treat highly diverse patients with minimal inter-site variability in ranges of diagnoses and disease severity. **Table 1** lines 1-3 show that participants in previous studies at our sites were nearly identical in key characteristics including age and %MBMI (an indication of degree of malnutrition). Our sites have a long



303 history of working together, share referrals on a regular basis and cross-train faculty and trainees (four faculty  
304 in Eating Disorders Program at Stanford completed fellowship training at UCSF). Thus, we have very similar  
305 clinical approaches to HCR and LCR. This is evidenced by similarities in some of our outcomes, such as  
306 shorter length of stay with HCR (**Table 1 line 5**). However, our rates of weight gain are different. Finally, we  
307 both show similar discharge %MBMI on LCR and HCR and therefore it is unclear whether the HCR group  
308 leaves hospital at any advantage. Thus, while there is enthusiasm for adopting HCR into practice, equipoise  
309 exists with respect to both the short-term outcomes in **Table 1** and the potential long-term outcomes.

310 **b. Participant recruitment and consent:** Participants and their parents will be approached upon hospitalization  
311 to sign assent (for those < 18 yr) and consent, respectively, within 24 hr of hospitalization. This may occur in  
312 the clinic when they are deemed medically unstable and waiting transfer to the hospital or in the hospital if  
313 admitted directly. Consent will include permission to collect study data in addition to review medical records  
314 and itemized hospital bills as needed.]. If a participant turns 18 yr while enrolled, s/he will be reconsented. This  
315 proposed study is under review for approval by the UCSF and Stanford Human Subjects Protection  
316 Committees. Approval for our SHAAN study has been renewed and updated continually at UCSF since 2002.

317 **B.3. Randomization:** Participants will be stratified by site and randomly assigned 1:1 to the two intervention  
318 strategies within 24 hr of hospital admission. The Data Coordination Center (DCC) (**see C.6.**) at UCSF will  
319 provide a secure unpredictable allocation sequence (e.g. A B B A ...) of envelopes to each site, labeled with  
320 sequential study ID numbers. The sequences will be generated using random block sizes to maximize balance  
321 between arms throughout accrual while ensuring the sequences remain unpredictable. As patients consent to  
322 study participation, clinical-research staff will assign the next available study ID number in sequence, identify  
323 the allocated intervention arm, and inform participants and their families of the assignment. In turn, the clinical-  
324 research staff will provide the linked study ID number and Medical Record Number to the DCC, which will store  
325 this Personal Health Information in a HIPAA-compliant manner along with the intervention assignment. At the  
326 end of accrual, the clinical-research staff will return envelopes for unassigned study IDs unopened to the DCC.

#### 327 **B.4. Study Interventions**

328 **a. Study groups:** Upon randomization, the LCR group will begin with 1400 cal per day; HCR group will  
329 commence at 2000 kcal. Given our previous findings, recognition of the so-called underfeeding syndrome and  
330 recent clinical experience, we will not test a 1200 calorie diet even though it is still currently recommended [16-  
331 18]. Our previous studies have adequately demonstrated that a 1200 kcal diet produces initial weight loss [20,  
332 31] and therefore do not feel it is ethical to assign participants to this treatment. We chose 1400 kcal to start  
333 because in our previously study of LCR, weight loss ceased on day 3 in hospital when diets averaging  
334 1411(299) kcal were prescribed. Diet prescriptions will increase by 200 kcal every other day in LCR and 200  
335 kcal per day in HCR until a target level is reached. **Target kcal** are calculated upon admission as percent of  
336 energy needs using Estimated Energy Requirement (EER) equations from the Institute of Medicine [54]. These  
337 equations are used clinically to set goals for caloric advancement although they are known to underestimate  
338 energy needs in patients with anorexia [55]. Therefore, we maximize these estimations by using **target weight**  
339 corresponding to the MBMI for age and sex (rather than current weight), a moderate activity factor of 1.2-1.3  
340 (despite bed rest), and additional 500 kcal (if current weight < the MBMI).

341 **b. Intervention (refeeding protocols):** During hospitalization, participants will follow a meal-based refeeding  
342 protocol that calls for eating three meals and three snacks per day, served on trays at the bedside, in the  
343 presence of 'Room Sitters'. The calorie level of the diet will be prescribed by the physicians per study protocol  
344 and the meals will be prepared by hospital foodservice. The study PI (Garber) will work with the Research  
345 Registered Dietitian (RD) and nutrition staff at both sites to ensure that menu selections fit the general  
346 macronutrient distribution of 30-40% fat, 15-25% protein and 35-55% carbohydrate. Menus will be continually  
347 analyzed (Software v.17.9.5, Computrition, Inc., Chatsworth, CA) to ensure conformance to this distribution as  
348 menu items are added or change over time. Dietetic Technicians will keep daily calorie counts, per Standard of  
349 Care (SOC), showing actual kcal consumed from food and formula.

350 A high energy liquid supplement ("formula") providing 1.06 kcal per mL (250 kcal per 240 mL can) will be used  
351 orally as needed to replace kcal refused in meals or snacks per a standard calorie replacement protocol. We  
352 previously reported a greater than 98% concordance between kcal prescribed and actual kcal ingested using  
353 this method, as well as an equal proportion of kcal intake from formula in LCR and HCR groups [20]. This  
354 finding supports our clinical observation that HCR meals can be completed without additional reliance on  
355 drinking formula. However, most AN patients do experience discomfort during refeeding and therefore all  
356 participants will receive SOC meal support including emotional support and techniques such as distraction. All

357 beverages will be weighed and measured before placement on the tray, with a 1 L per day free water  
358 restriction. Room sitters will observe intake of all meals/snacks and remain in the room for 45 min afterwards.

359 c. Monitoring of electrolytes and correction of abnormalities: Blood for electrolytes will be obtained between 5  
360 and 7 am every 24hr for the first 7 days and more frequently if needed. Since the risk of refeeding decreases  
361 after the first week, day 8 electrolytes will be monitored every other day starting on day 8 unless there is  
362 continued evidence of abnormalities. Electrolyte abnormalities (serum phosphorus  $\leq 3$  mg/dL, magnesium  $\leq 1.7$   
363 mg/dL, or potassium  $\leq 3.5$  mEq/L) will be corrected with a standardized protocol for both sites [2, 56]. Patients  
364 with hypophosphatemia will be treated with sodium potassium phosphate, 250 mg per packet (8 mmol  
365 phosphorus, 7.1 mEq potassium), one packet three times a day by mouth for a serum phosphorus between 2.5  
366 and 2.9 mg/dL, and two packets (500 mg) three times a day for a serum phosphorus  $< 2.5$  mg/dL. Those with  
367 hypomagnesemia will be prescribed magnesium amino acids chelate (133 mg elemental Mg per tablet), one  
368 tablet three times a day by mouth. Declining phosphorus levels that are in the normal range will not be treated.  
369 Participants will also receive a SOC supplement regimen including 500mg elemental calcium twice per day and  
370 an adult multivitamin with minerals once per day.

371 b. Study time points: Participants will be followed prospectively in hospital with daily measures of calorie and  
372 supplement intake and weight from admission through discharge. Patients will be discharged when medically  
373 stable, with the primary criterion of heart rate  $> 45$  bpm for least 24 hr. Upon discharge, the project coordinator  
374 will schedule participants for five follow-ups (**see Table 2**) as time points established by our preliminary  
375 studies. Day 10 is the time nearest hospital discharge for both groups where medical and electrolyte stability is  
376 expected. Month 1, 3, 6 and 12 all contributed meaningfully to the weight recovery trajectory in our preliminary  
377 follow-up study (mo 9 was collapsed because it was not different than mo 6 or 12). Finally, these time points  
378 are sufficiently coordinated with SOC follow-up so as to minimize participant burden and maximize retention.

379 **B.5. Retention and Attrition:** We expect to retain 85% of our sample through one year of follow-up. This is  
380 consistent with other open follow-up studies of AN [57] and feasible given our patients volumes and return  
381 rates (**B.2.a.**). We will actively retain participants by providing incentives: movie tickets upon enrollment and a  
382 \$50 for every follow-up visit attended. Primary analyses will use intent-to-treat longitudinal models that will  
383 include outcomes from randomization through the time of dropout or 12 mo, whichever is longer. Secondary  
384 analyses will adjust models for baseline covariates that may be associated with loss to follow-up. We anticipate  
385 very few missing outcomes because weight and vital sign (medical stability) measures are SOC in AN care  
386 during hospital and at follow-up and the majority of patients hospitalized at our programs return to us for follow-  
387 up care. Reasons for refusal to participate will be collected from patients and families who decline enrollment.  
388

389 **C. Data Collection and Rationale for study measures:** Other than the treatment we are testing (HCR vs.  
390 LCR), patients will receive SOC in the hospital. Thus, as shown in **Table 2**, the vast majority of procedures in  
391 hospital are SOC. Follow-up visits, on the other hand, are for the purpose of collecting data and will be  
392 scheduled at the designated time points. All questionnaires and interviews are provided in the **Appendix**.

393 **C.1. Baseline Covariates:** The following covariates will be collected upon admission prior to randomization.

- 394 (1) Demographics and eating disorder history: an intake form will be self-administered (with study coordinator  
395 as proctor, 15 min) to assess: highest body weight, lowest body, date of onset (to calculate length of illness  
396 and rapidity of weight loss), family history of eating disorder, self-reported race/ethnicity, maternal  
397 education and zipcode (to indicate socioeconomic status), date of birth.
- 398 (2) Eating Disorder Examination (EDE): is a standardized research interview that measures eating disorders  
399 psychopathology [58]. Dr. Le Grange (co-I, UCSF) has used this tool extensively in RCTs examining  
400 psychotherapeutic modalities and long-term recovery in AN and BN [59-61] and to categorize lower and  
401 higher risk study participants [62]. He will oversee the psychological aspects of this study, including training  
402 EDE interviewers at both sites, who will be blinded to the treatment assignment, and monitoring inter-rater  
403 reliability in an ongoing basis and retraining staff as necessary.
- 404 (3) Food recall: dietary intake for the day prior to hospital admission will be assessed with a 24-hr food recall  
405 by the Research RD and analyzed via Nutrition Data System for Research (NDS-R [63]) for total kcal and  
406 macronutrient profile. Dietary Density (DDS) and Variety Scores (DVS) will be calculated since acceptance  
407 of more energy dense and variety of foods in hospital has been shown to predict recovery at 8 mo [64].
- 408 (4) Severity of illness: %mBMI and HR on admission

409 **C.2. Data Collection (see Table 2 for procedure schedule)**

410 a. SOC in hospital: Participants will be followed daily in hospital. Consistent with SOC for these patients, night



time HR will be assessed with continuous cardiac monitoring throughout hospital stay, temperature will be measured orally and BP will be measured every 4-8 hr. Postural changes will be assessed with supine measurements (after 5 min), followed by standing measurements (after 2 min). When multiple vital signs measures are taken per protocol during one hospital day or one outpatient clinic visit, the lowest HR will be recorded. Weight is measured every morning upon waking after voiding on an electronic scale, with the subject wearing only a hospital gown. Height will be measured upon admit with wall-mounted stadiometer. Electrolytes will be monitored per SOC as described in **B.4.c**.

**b. Study in hospital:** Participants at both sites will complete the questionnaires above.

**c. Study follow-up data:** Participants will return for five study follow-up visits through 12 months post-randomization. Anthropometrics and vital signs: Height, weight and vital signs will be measured according to the in-hospital protocol by trained medical staff with standard equipment. Follow-up visits will be scheduled after school/work. Although this is not ideal for data collection, in our vast experience with adolescents it is good for feasibility and retention long-term. Afternoon weights are less accurate than in-hospital morning weights, however they will be comparable between follow-up visits beginning at dy 10. Vital sign measures will be taken after a 20-min rest to minimize the influence of activity required to attend the visit (e.g. walk from car). After resting, vital signs will be measured in the research center with standard, calibrated equipment and with postural changes according to the procedure above. Data will be entered directly into the electronic data capture system with fillable and constrained sections for anthropometric measures and vital signs to minimize error. Participants will complete these questionnaires:

- (1) **Follow-up form:** This self-report form was developed as part of our National Eating Disorder Quality Improvement Consortium (NEDQIC) of 14 eating disorder programs. It will take 5 min to complete at all follow-up visits. The purpose is to document medications pertinent to recovery measures (menses and psychopathology), including medications, current mental health care, other medical and psychological/psychiatric care (“other care”) outside of our medical centers (e.g. residential care, psychiatric hospitalization). Psychotherapy modality and adherence may be important prognostic covariates of long-term outcomes [30, 57, 65] in this open follow-up study.
- (2) **Health Care Utilization and Missed School (HCUMS) Survey:** This questionnaire will draw from established tools to assess cost, however it will be tailored for AN and integrated with the follow-up form (above). In addition to “other care”, it assesses health care utilization since last study visit including medications, physician visits, dental visits, hospitalizations, ER visits and laboratory testing.
- (3) **Food records:** Parents (or participants if > 18 yrs and living independently) will be educated on keeping 4-day records at home. The research RD will collect these at every follow-up visit, check them for completeness and send them to UCSF for analysis (as described for 24 hr recalls). These data will be used to prospectively track dietary intake during follow up, which could be associated with long-term effects.

### C.3. Timing of Procedures: Table 2

|                                     | INPATIENT |       |     | OUTPATIENT FOLLOW-UP |          |          |          |           |
|-------------------------------------|-----------|-------|-----|----------------------|----------|----------|----------|-----------|
|                                     | Admit     | Daily | DC* | Rnd+10 dy            | Rnd+1 Mo | Rnd+3 Mo | Rnd+6 Mo | Rnd+12 Mo |
| <b>MEDICINE/NURSING PROCEDURES</b>  |           |       |     |                      |          |          |          |           |
| Weight                              | SOC       | SOC   | SOC | X                    | X        | X        | X        | X         |
| Height                              | SOC       |       |     | X                    | X        | X        | X        | X         |
| Vital Signs                         | SOC       | SOC   | SOC | X                    | X        | X        | X        | X         |
| Electrolyte monitoring ¥            | SOC       | X     | SOC |                      |          |          |          |           |
| <b>NUTRITION PROCEDURES</b>         |           |       |     |                      |          |          |          |           |
| 24-hr food recall                   | X         |       |     |                      |          |          |          |           |
| Patient educn--Food records         |           |       | X   |                      |          |          |          |           |
| 4-day food record                   |           |       |     | X                    | X        | X        | X        | X         |
| <b>QUESTIONNAIRE ADMINISTRATION</b> |           |       |     |                      |          |          |          |           |
| EDE                                 | X         |       | X   |                      | X        | X        | X        | X         |
| HCUMS survey                        |           |       |     | X                    | X        | X        | X        | X         |
| Demogr & Eating Disorder history    | X         |       |     |                      |          |          |          |           |
| Follow-up form                      |           |       |     | X                    | X        | X        | X        | X         |

\* DC = discharge; SOC = Standard Of Care; Rnd = Randomization; ¥ SOC is every other day; we will monitor daily as part of Aim 2.

### C.4. Safety

448 **a. Medical Oversight:** This study begins with a hospitalization as per SOC for patients who are medically  
449 unstable with malnutrition secondary to AN. Patients will be admitted to the adolescent medicine service if they  
450 are deemed medically unstable per published criteria [27]. Once admitted, patients will be eligible for study  
451 enrollment. The treatment (HCR or LCR) is limited to the hospital stay. Aside from the questionnaires at both  
452 sites and daily (instead of every other day) electrolyte monitoring, all hospital procedures are consistent with  
453 SOC. After discharge, participants will be followed openly. They are required to be under a physician's care to  
454 ensure medical stability but not required to receive that care from us (however many do). Many patients have a  
455 psychiatrist to manage psychiatric co-morbidities such as anxiety and depression. If they receive care or  
456 hospitalization elsewhere they can still continue in the study and we will collect that with our follow-up form  
457 (**see Appendix**). If a participant becomes medically unstable and they refuse hospitalization against medical  
458 advice, they will be withdrawn from the study because continued outpatient treatment would be unsafe.

459 **b. Prospective monitoring of AEs:** Aim 2 specifies three electrolyte abnormalities that will be monitored  
460 prospectively in all participants and documented as described in **C.4.b.&c**: hypophosphatemia ( $\leq 3$  mg/dL), 2B)  
461 hypomagnesaemia ( $\leq 1.7$  mg/dL), and 2C) hypokalemia ( $\leq 3.5$  mEq/L).

462 **c. Independent Data Monitoring Committee (DMC):** As a multi-center clinical trial comparing treatments, the  
463 proposed study is required to have an independent DMC according to the NICHD policy for clinical research  
464 monitoring. The purpose of the DMC is to ensure the safety of participants and validity of the trial. We will draft  
465 a DMC Charter using the NICHD template, the content of which is described in Human Subjects.

## 466 **C.5 Statistical Methods**

467 **a. Projected pool of eligible participants and accrual rate:** At Stanford, in 2012 there were 295 admissions to  
468 the dedicated inpatient eating disorders unit, with approximately 36% of patients meeting DSM-4 criteria for AN  
469 [66]; 100 similar patients were admitted at UCSF. With the broader eligibility criteria also including DSM-5, we  
470 anticipate at least 40% of patients (120 per yr at Stanford and 40 at UCSF) will be eligible. Of those who are  
471 eligible, we estimate that at least 50% will agree to participate and thus we will not attempt to achieve equal  
472 enrollment across sites. We will accrue 3-4 participants per mo over 3 yr until N=120 is reached [and retain  
473 85% of this sample through 12 mo as shown in open follow-up studies of participants with AN [57].

474 **b. Commitments of Site PIs, Research Teams, and Participants:** Both site PIs have successfully recruited and  
475 retained AN participants in research projects and seen them to completion and publication. Furthermore, co-PI  
476 Hilton is a faculty biostatistician with extensive experience in clinical trials. She will lead the DCC, aiming to  
477 ensure the trial is designed, executed, and analyzed without bias. Patient incentives to participate will  
478 emphasize the value of their contributions to medical research and remuneration for their time (section **B.5**).

### 479 **c. Data Analyses:**

480 **Sample Description:** The study sample will be summarized and described (e.g., mean  $\pm$  SD) by stratification  
481 factor and baseline covariates to confirm general balance by arm and data will be summarized for  
482 completeness of follow-up (e.g., length of stay, last visit).

483 **Aim 1A: Primary efficacy outcome.** A mixed-effects regression model, with random intercept and slope and  
484 stratified by study site will compare study arms with respect to achievement and maintenance of clinical  
485 remission defined as the combination of MBMI and EDE score at mo 1,3,6,12 (separate analyses below). The  
486 model will assume linear trends over log-transformed time in two periods (mo. 0-3 and 3-12), estimate mean  
487 (95% CI) remission rates within and between arms at mo 3 and 12, and test for statistical significance at mo 3.  
488 This model reflects the fluctuating nature of MBMI and EDE in AN and reflects our hypothesis that remission  
489 will be higher in HCR than LCR at 3 mo based on our preliminary data (**Fig 2**). Aim 1 models will be  
490 supplemented with (i) potential moderators at baseline (included in regression models as main effects and  
491 interactions with period and time), such as DSM-5 criteria and EDE thresholds of risk and (ii) potential  
492 mediators at follow-up (included as time-dependent covariates), such as food recall (DDS and DVS),  
493 healthcare utilization, or incidence of AEs. In addition, separate mixed-effects models will analyze continuous  
494 versions of MBMI, EDE and HR to describe longitudinal trajectories.

495 **Aim 1B: Secondary efficacy outcome.** Medical instability is primarily defined as bradycardia (daytime HR  $<$   
496 50 bpm or night time HR  $<$  45 bpm), but also includes hypotension (BP  $<$ 90/45 mmHg), hypothermia ( $<$  36° C)  
497 and orthostasis (increase in HR  $>$  20 bpm or decrease in systolic BP  $>$  20 mmHg or decrease in diastolic BP  
498  $>$  10 mmHg from lying to standing) [27]. Because medical stability fluctuates in AN, we will use an analogous  
499 model to compare arms, daily in hospital and at mo 1,3,6,12. This model will assume linear trends over log-  
500 transformed time from admission to discharge, and discharge to mo 12. The model will estimate mean (95%

CI) medical stability rates within and between arms at dy 10 and mo 12, and test for significance at dy 10.

**Aim 2. Safety:** Cox regression models, stratified by study site, will compare rates of AE incidence by arm during hospitalization for the first of the following: 2A) hypophosphatemia ( $\leq 3$  mg/dL), 2B) hypomagnesaemia ( $\leq 1.7$  mg/dL), 2C) hypokalemia ( $\leq 3.5$  mEq/L). Follow-up will be censored at discharge. The proportional hazards assumption will be examined and alternative models used if violated. The model will generate an estimate of the hazard ratio (95% CI) and a Kaplan-Meier cumulative incidence plot will display arm-specific cumulative incidence rates. Analogous exploratory models will estimate rates separately for each AE. These incidence estimates will serve as valuable benchmarks for future studies.

**Aim 3. CE:** A decision tree of treatment costs, AEs, health care utilized (including rehospitalizations), and remission will compare the CE between the two study arms. The main CE outcome is incremental cost per additional adolescent remitted. Health care utilization will be costed using national data sources such as acquisition costs for medications, Kids-HCUP for hospitalizations, CPT codes for physician visits and mental health visits, and internet based costs for lab tests. We will use 2014 US costs and not charges. Indirect costs including missed school and workdays will be assessed and costed using national estimates of wages and salaries of this age group from the Bureau of Labor Statistics, in order to estimate loss of leisure time (school) or salary time (work).

We will determine the incremental CE ratio (ICER) as:

$$\text{ICER} = \frac{\text{Cost}_{\text{LCR}} - \text{Cost}_{\text{HCR}}}{\text{Number Recovered}_{\text{LCR}} - \text{Number Recovered}_{\text{HCR}}}$$

Effectiveness will also be indicated by cost of rehospitalizations avoided (ie, rehospitalizations in LCR-HCR).

We will determine the net monetary benefit (NB) of each treatment option as:  $\text{NB} = \text{Effectiveness} \times \text{Willingness To Pay (WTP)} - \text{Cost}$ . A positive difference in NB between treatments indicates CE. We will also calculate an acceptability curve to demonstrate how parameter uncertainty affects the likelihood of selecting the optimal treatment at a given WTP threshold. Cost of treatment will be determined by initial hospitalization and 12 mo follow-up costs (not charges) including AEs and rehospitalizations. The HCUMS follow-up survey will assess indirect costs such as lost school and/or work (wages) using national data sources (see C.2.c.(2)).

Effectiveness will be determined per aim 1; ICER will also use time (incremental cost per additional day of recovery time over 12 mo).

#### d. Power and Sample-size Considerations:

**Aim 1.** Based on studies of AN remission [30, 67], **Table 3.A** shows that with N=60 per arm we have 80% power on 2-sided 0.05-level test to detect a 20% difference (8% vs. 28%) if data were cross-sectional ( $\rho=1$ ). Our longitudinal data will allow detection of smaller effects, especially if the correlation among outcomes is low ( $\rho < 0.8$ ). We anticipate 85% retention and non-differential dropout by arm. Since rates of **medical stability** at dy 10 are also expected to differ by at least 12% (**Table 3.B.**), we will be adequately powered for Aim 1B.

**Table 3.A Detectable differences in remission-rates:**

| $\rho^*$ | LCR | HCR | Mo-3 Diff |
|----------|-----|-----|-----------|
| 1.0      | 8%  | 28% | 20%       |
| 0.8      | 14% | 34% | 20%       |
| 0.6      | 16% | 34% | 18%       |
| 0.4      | 18% | 34% | 16%       |
| 0.2      | 20% | 34% | 14%       |
| 0.1      | 22% | 34% | 12%       |

**Table 3.B. Detectable differences in medical stability-rates**

| $\rho^*$ | LCR | HCR | Day-10 Diff |
|----------|-----|-----|-------------|
| 1.0      | 72% | 92% | 20%         |
| 0.8      | 66% | 86% | 20%         |
| 0.6      | 66% | 84% | 18%         |
| 0.4      | 66% | 82% | 16%         |
| 0.2      | 66% | 80% | 14%         |
| 0.1      | 66% | 78% | 12%         |

\*correlation among 5 time points within participant

## C.6. Data Management

**a. DCC:** Dr. Hilton at UCSF will lead the DCC, which will be autonomous and independent of the clinical sites. It will be housed in the UCSF department of Epidemiology & Biostatistics, which will be located on the Mission Bay campus of the University as of Sep 2014. The department is staffed primarily by statisticians and scientific researchers who conduct data-intensive research, collaborative data collection and analyses from multiple sites. They are equipped with an independent network of sophisticated and reliable computer systems with high-level security for protecting health information. The network is maintained by an in-house computer staff, which manages all aspects of the network, including ongoing maintenance, installation and upgrades of hardware, software and structural components such as cabling and servers. Dr. Hilton is the lead RCT biostatistician and routinely guides the work of Master-level statisticians, data managers and programmers. Dr. Hilton has coordinated trials for numerous previous and on-going NIH-funded studies, chairs multiple DMCs, and consults for FDA and pharmaceutical companies on trial design and analyses. Thus, UCSF has experience maintaining a distinctly separate but closely coordinated working relationship between clinical sites and data center.

**b. Electronic data capture:** Both clinical sites are equipped with the same Research Electronic Data Capture (REDCap) system for databases, data entry forms, online questionnaires and data validation. Data will be automatically exported to STATA for analysis using The Data Export Utility. The DCC uses advanced features including branching logic for dynamic data entry form generation, file uploading, data importing, and embedded calculated database fields.

**c. Confidentiality:** Loss of confidentiality is a recognized risk of participating in clinical research since protected health information, medical history, and demographics are used for the study. Loss of privacy may lead to problems with insurability or social stigmatization. We will make effort to minimize this risk and have systems in place to ensure confidentiality. Data will be de-identified and thereafter handled by ID number, rather than by name. No publications will include the names of patients or identifying information about study participants.

**C.7. Project Feasibility:** The proposed project is feasible for several reasons. First, our enrollment targets are feasible and historical treatment approaches are quite similar. Second, PIs at both clinical sites have developed the preliminary data leading up to the proposed project. Our work has spurred a new line of inquiry in this area; our most recent papers were published in a special issue of *J Adolesc Health* highlighting refeeding in AN. Furthermore, the PIs have worked together extensively to disseminate these results, build consensus in this area and educate fellow clinicians through collaborative presentations at six international conferences. Third, this work is already being translated into clinical practice and policy; we published a policy statement on hypophosphatemia in AN refeeding [68] and have a policy paper on medical management of AN in press [23]. Finally, co-PI Hilton, is a senior biostatistician with extensive experience in clinical trials to ensure that randomization, data collection, transfer and management are synchronized and rigorous.

**C.8. Anticipated Limitations and Difficulties:** As with any clinical study, enrollment is the first challenge. We examined feasibility carefully and included two sites to ensure that enrollment targets are met. We will have substantial outcome data that will allow us to detect meaningful differences upon discharge from hospital and at one year. A second known problem with multi-center studies is variability in trial conduct between sites, which we will actively minimize by: 1.) disseminating and pilot-testing protocols, 2.) using the DCC to produce randomization schemes for each site, to train personnel on electronic data capture and transfer, and to manage and analyze all data, 3.) training and recalibrating personnel on protocol execution, interviews, questionnaires and data collection, 4.) utilizing the same type of equipment at both sites when possible, and 5.) scheduling regular lab and PI meetings. Despite all of these efforts, the DCC will devise process measures that will allow monitoring of variability in trial conduct between sites and over time. A third problem is secular trends associated with the long enrollment period of this study, which may impact outcomes; however, the inclusion of the new atypical AN diagnosis will increase the generalizability of our findings. The final and largest limitation of the proposed study is that it is open-label (unblinded) and open follow-up. Participants will receive various mental health care during follow-up. Randomly assigned, protocolized mental health care would be ideal but is beyond the scope and budget of the proposed work. We expect this to influence 12 mo effects [69, 70] but to be distributed equally between arms. We will collect comprehensive data on mental and other healthcare utilization to adjust long-term effects and establish inclusion criteria for our future studies.

**C.9. Timeline: Table 3**

| YEAR           | YR 1           |      | YR 2           |      | YR 3 |      | YR 4    |      | YR 5     |      |
|----------------|----------------|------|----------------|------|------|------|---------|------|----------|------|
|                | 1-6            | 7-12 | 1-6            | 7-12 | 1-6  | 7-12 | 1-6     | 7-12 | 1-6      | 7-12 |
| Training       | X              | *    | *              | *    | *    | *    | *       | *    |          |      |
| DSMB           | X              |      | X              |      | X    |      | X       |      | X        |      |
| Lab Meetings   | X              | X    | X              | X    | X    | X    | X       | X    | X        | X    |
| Enroll         | 0              | 20   | 20             | 20   | 20   | 20   | 20      | 0    | 0        | 0    |
| 1-yr Follow-up | 0              | 0    | 20             | 20   | 20   | 20   | 20      | 20   | 0        | 0    |
| Data           | Refine systems |      | Collect/manage |      |      |      | Analyze |      | Write-up |      |

\* Regular retraining to control inter-rater variability

**C.10. Future directions:** The purpose of this multi-center RCT is to compare short- and long-term recovery in adolescents hospitalized with AN secondary to malnutrition and refed on LCR vs. HCR. The proposed study will provide evidence to develop recommendations for refeeding of patients with AN. The PIs are actively involved in policy-making within their professional organizations and will continue to disseminate this work widely [50]. We will build on this work with future studies of: 1.) The effect of dietary components on safety (such as carbohydrate load); 2.) Mechanisms to explain any differences in cognitive recovery (such as meal-time stress); 3.) Quality-of-life and cost-of-care decisions (such as re-engagement in peer networks).

## BIBLIOGRAPHY & REFERENCES CITED

1. Shamim T, Golden NH, Arden M, et al. Resolution of vital sign instability: an objective measure of medical stability in anorexia nervosa. *J Adolesc Health* 2003 Jan;32(1):73-77.
2. Ornstein RM, Golden NH, Jacobson MS, et al. Hypophosphatemia during nutritional rehabilitation in anorexia nervosa: implications for refeeding and monitoring. *J Adolesc Health* 2003 Jan;32(1):83-88.
3. Steinhausen HC, Grigoriu-Serbanescu M, Boyadjieva S, et al. Course and predictors of rehospitalization in adolescent anorexia nervosa in a multisite study. *Int J Eat Disord* 2008 Jan;41(1):29-36.
4. Bardach NS, Coker TR, Zima BT, et al. Common and costly hospitalizations for pediatric mental health disorders. *Pediatrics* 2014 Apr;133(4):602-609.
5. Lock J, Litt I. What predicts maintenance of weight for adolescents medically hospitalized for anorexia nervosa? *Eat Disord* 2003 Spring;11(1):1-7.
6. Lund BC, Hernandez ER, Yates WR, et al. Rate of inpatient weight restoration predicts outcome in anorexia nervosa. *Int J Eat Disord* 2009 May;42(4):301-305.
7. Baran SA, Weltzin TE, Kaye WH. Low discharge weight and outcome in anorexia nervosa. *Am J Psychiatry* 1995 Jul;152(7):1070-1072.
8. Le Grange D, Accurso EC, Lock J, et al. Early weight gain predicts outcome in two treatments for adolescent anorexia nervosa. *Int J Eat Disord* 2014 Mar;47(2):124-129.
9. Schnitker MA, Mattman PE, Bliss TL. A clinical study of malnutrition in Japanese prisoners of war. *Ann Intern Med* 1951 Jul;35(1):69-96.
10. Keys A, Brozek, K, Henschel, A, Mickelsen, O, & Taylor, HL. *The biology of human starvation*. Minneapolis: University of Minnesota Press 1950.
11. Fisher M, Simpser E, Schneider M. Hypophosphatemia secondary to oral refeeding in anorexia nervosa. *Int J Eat Disord* 2000 Sep;28(2):181-187.
12. Kohn MR, Golden NH, Shenker IR. Cardiac arrest and delirium: presentations of the refeeding syndrome in severely malnourished adolescents with anorexia nervosa. *J Adolesc Health* 1998 Mar;22(3):239-243.
13. Beumont PJ, Large M. Hypophosphataemia, delirium and cardiac arrhythmia in anorexia nervosa. *Med J Aust* 1991 Oct 21;155(8):519-522.
14. Hall DE, Kahan B, Snitzer J. Delirium associated with hypophosphatemia in a patient with anorexia nervosa. *J Adolesc Health* 1994 Mar;15(2):176-178.
15. MARSIPAN Working Group. Management of Really Sick Patients with Anorexia Nervosa. [cited 2012 June 25]; CR 162. Royal College Psychiatrists and Royal College of Physicians London, Oct 2010:[Available from: <http://www.rcpsych.ac.uk/files/pdfversion/CR162.pdf>]
16. Practice guideline for the treatment of patients with eating disorders (revision). American Psychiatric Association Work Group on Eating Disorders. *Am J Psychiatry* 2000 Jan;157(1 Suppl):1-39.
17. Treatment of patients with eating disorders, third edition. American Psychiatric Association. *Am J Psychiatry* 2006 Jul;163(7 Suppl):4-54.
18. Position of the American Dietetic Association: Nutrition intervention in the treatment of anorexia nervosa, bulimia nervosa, and other eating disorders. *J Am Diet Assoc* 2006 Dec;106(12):2073-2082.
19. Garber AK, Michihata N, Hetnal K, et al. A prospective examination of weight gain in hospitalized adolescents with anorexia nervosa on a recommended refeeding protocol. *J Adolesc Health* 2012 Jan;50(1):24-29.
20. Garber AK, Mauldin K, Michihata N, et al. Higher calorie diets increase rate of weight gain and shorten hospital stay in hospitalized adolescents with anorexia nervosa. *J Adolesc Health* 2013 Nov;53(5):579-584.
21. Golden NH, Keane-Miller C, Sainani KL, et al. Higher caloric intake in hospitalized adolescents with anorexia nervosa is associated with reduced length of stay and no increased rate of refeeding syndrome. *J Adolesc Health* 2013 Nov;53(5):573-578.
22. Schwartz BI, Mansbach JM, Marion JG, et al. Variations in admission practices for adolescents with anorexia nervosa: a North American sample. *J Adolesc Health* 2008 Nov;43(5):425-431.
23. Medical Management of Restrictive Eating Disorders in Adolescents and Young Adults:



- 651 Position Paper of the Society for Adolescent Health and Medicine. *J Adolesc Health* Accepted Oct 10, 2014;in  
652 press.
- 653 24. Steinhausen HC. The outcome of anorexia nervosa in the 20th century. *Am J Psychiatry* 2002  
654 Aug;159(8):1284-1293.
- 655 25. Ornstein RM, Rosen DS, Mammel KA, et al. Distribution of eating disorders in children and adolescents  
656 using the proposed DSM-5 criteria for feeding and eating disorders. *J Adolesc Health* 2013 Aug;53(2):303-305.
- 657 26. Whitelaw M GH, Lee K, Sawyer, S. . The obesity epidemic and a changing profile of eating disorders.  
658 *Pediatrics* 2014;(under review).
- 659 27. Medical Management of Restrictive Eating Disorders in Adolescents and Young Adults: Position Paper  
660 of the Society for Adolescent Health and Medicine. *J Adolesc Health Care* Oct 10, 2014;(in press).
- 661 28. Golden NH, Jacobson MS, Schebendach J, et al. Resumption of menses in anorexia nervosa. *Arch*  
662 *Pediatr Adolesc Med* 1997 Jan;151(1):16-21.
- 663 29. Golden NH, Yang W, Jacobson MS, et al. Expected body weight in adolescents: comparison between  
664 weight-for-stature and BMI methods. *Pediatrics* 2012 Dec;130(6):e1607-1613.
- 665 30. Lock J, Le Grange D, Agras WS, et al. Randomized clinical trial comparing family-based treatment with  
666 adolescent-focused individual therapy for adolescents with anorexia nervosa. *Arch Gen Psychiatry* 2010  
667 Oct;67(10):1025-1032.
- 668 31. Solanto MV, Jacobson MS, Heller L, et al. Rate of weight gain of inpatients with anorexia nervosa  
669 under two behavioral contracts. *Pediatrics* 1994 Jun;93(6 Pt 1):989-991.
- 670 32. NICE. Eating Disorders: Core interventions in the treatment and management of anorexia nervosa,  
671 bulimia nervosa, and related eating disorders. 2004 [cited 2012 Sep 12]; Available from:  
672 <http://www.nice.org.uk/nicemedia/pdf/CG9FullGuideline.pdf>
- 673 33. Rigaud D, Boulier A, Tallonneau I, et al. Body fluid retention and body weight change in anorexia  
674 nervosa patients during refeeding. *Clin Nutr* 2010 Dec;29(6):749-755.
- 675 34. Vaisman N, Rossi M, Goldberg E, et al. FLUID BALANCE ABNORMALITY ON REFEEDING  
676 PATIENTS WITH ANOREXIA-NERVOSA (AN). *Pediatr Res* 1987 Apr;21(4):A177-A177.
- 677 35. Schebendach JE, Golden NH, Jacobson MS, et al. The metabolic responses to starvation and refeeding  
678 in adolescents with anorexia nervosa. *Ann N Y Acad Sci* 1997 May 28;817:110-119.
- 679 36. Kraft MD, Btaiche IF, Sacks GS. Review of the refeeding syndrome. *Nutrition in clinical practice* :  
680 official publication of the American Society for Parenteral and Enteral Nutrition 2005 Dec;20(6):625-633.
- 681 37. Gentile MG, Pastorelli P, Ciceri R, et al. Specialized refeeding treatment for anorexia nervosa patients  
682 suffering from extreme undernutrition. *Clin Nutr* 2010 Oct;29(5):627-632.
- 683 38. Rigaud D, Brondel L, Poupard AT, et al. A randomized trial on the efficacy of a 2-month tube feeding  
684 regimen in anorexia nervosa: A 1-year follow-up study. *Clin Nutr* 2007 Aug;26(4):421-429.
- 685 39. Gaudiani JL, Sabel AL, Mascolo M, et al. Severe anorexia nervosa: outcomes from a medical  
686 stabilization unit. *Int J Eat Disord* 2012 Jan;45(1):85-92.
- 687 40. Kohn MR, Madden S, Clarke SD. Refeeding in anorexia nervosa: increased safety and efficiency  
688 through understanding the pathophysiology of protein calorie malnutrition. *Curr Opin Pediatr* 2011  
689 Aug;23(4):390-394.
- 690 41. Norris ML, Pinhas L, Nadeau PO, et al. Delirium and refeeding syndrome in anorexia nervosa. *Int J Eat*  
691 *Disord* 2011 Oct 19.
- 692 42. Weinsier RL, Krumdieck CL. Death resulting from overzealous total parenteral nutrition: the refeeding  
693 syndrome revisited. *The American journal of clinical nutrition* 1981 Mar;34(3):393-399.
- 694 43. Whitelaw M, Gilbertson H, Lam PY, et al. Does aggressive refeeding in hospitalized adolescents with  
695 anorexia nervosa result in increased hypophosphatemia? *J Adolesc Health* 2010 Jun;46(6):577-582.
- 696 44. Leclerc A, Turrini T, Sherwood K, et al. Evaluation of a nutrition rehabilitation protocol in hospitalized  
697 adolescents with restrictive eating disorders. *J Adolesc Health* 2013 Nov;53(5):585-589.
- 698 45. Rigaud D, Verges B, Colas-Linhart N, et al. Hormonal and psychological factors linked to the increased  
699 thermic effect of food in malnourished fasting anorexia nervosa. *J Clin Endocrinol Metab* 2007  
700 May;92(5):1623-1629.
- 701 46. Steinglass JE, Sysko R, Mayer L, et al. Pre-meal anxiety and food intake in anorexia nervosa. *Appetite*  
702 2010 Oct;55(2):214-218.

- 703 47. Van Wymelbeke V, Brondel L, Marcel Brun J, et al. Factors associated with the increase in resting  
704 energy expenditure during refeeding in malnourished anorexia nervosa patients. *Am J Clin Nutr* 2004  
705 Dec;80(6):1469-1477.
- 706 48. Birmingham CL, Hlynsky J, Whiteside L, et al. Caloric requirement for refeeding inpatients with  
707 anorexia nervosa: the contribution of anxiety exercise, and cigarette smoking. *Eat Weight Disord* 2005  
708 Mar;10(1):e6-9.
- 709 49. Forman SF, Grodin LF, Graham DA, et al. An eleven site national quality improvement evaluation of  
710 adolescent medicine-based eating disorder programs: predictors of weight outcomes at one year and risk  
711 adjustment analyses. *J Adolesc Health* 2011 Dec;49(6):594-600.
- 712 50. Golden NH, Katzman DK, Kreipe RE, et al. Eating disorders in adolescents: position paper of the  
713 Society for Adolescent Medicine. *J Adolesc Health* 2003 Dec;33(6):496-503.
- 714 51. Sheikh A, Smeeth L, Ashcroft R. Randomised controlled trials in primary care: scope and application.  
715 *The British journal of general practice : the journal of the Royal College of General Practitioners* 2002  
716 Sep;52(482):746-751.
- 717 52. Diagnostic and Statistical Manual of Mental Disorders: DSM-IV-TR. American Psychiatric Association,  
718 Washington DC: American Psychiatric Publishing Inc 2000.
- 719 53. Forman SF MN, Hehn R, Kapphahn CJ, Callahan ST, Sigel EJ, Bravender T, Romano M, Rome ES,  
720 Fisher M, Malizio JB, Rosen DS, Mammel KA, Hergenroeder AC, Buckelew SM, Jay S, Lindenbaum J, Rickert  
721 V, Garber A, Golden NH, Woods ER; National Eating Disorder QI Collaborative. Predictors of outcome at one  
722 year in adolescents with restrictive eating disorders using DSM 5 criteria: report of the national eating disorders  
723 quality improvement collaborative. (in preparation) 2014.
- 724 54. A Report of the Panel on Macronutrients, Subcommittees on Upper Reference Levels of Nutrients and Interpretation and Uses of Dietary  
725 Reference Intakes, Standing Committee on the Scientific Evaluation of Dietary Reference Intakes. "5 Energy." *Dietary Reference Intakes for*  
726 *Energy, Carbohydrate, Fiber, Fat, Fatty Acids, Cholesterol, Protein, and Amino Acids (Macronutrients)*. Washington, DC: The National  
727 Academies Press, 2005.
- 728 55. Cuerda C, Ruiz A, Velasco C, et al. How accurate are predictive formulas calculating energy  
729 expenditure in adolescent patients with anorexia nervosa? *Clinical nutrition* 2007 Feb;26(1):100-106.
- 730 56. Clark CL, Sacks GS, Dickerson RN, et al. Treatment of hypophosphatemia in patients receiving  
731 specialized nutrition support using a graduated dosing scheme: results from a prospective clinical trial. *Crit Care*  
732 *Med* 1995 Sep;23(9):1504-1511.
- 733 57. Loeb KL, Walsh BT, Lock J, et al. Open trial of family-based treatment for full and partial anorexia  
734 nervosa in adolescence: evidence of successful dissemination. *J Am Acad Child Adolesc Psychiatry* 2007  
735 Jul;46(7):792-800.
- 736 58. Cooper Z, Fairburn CG. The Eating Disorder Examination: A semi-structured interview for the  
737 assessment of the specific psychopathology of eating disorders. *International Journal of Eating Disorders*  
738 1987;6:1-8.
- 739 59. Binford R, Le Grange D, Jellar C. EDE and adolescent bulimia nervosa: Interview or self-report? *Int J*  
740 *Eat Disord* 2005;37:44-49.
- 741 60. Passi V, Bryson S, Lock J. Assessment of eating disorders in adolescents with anorexia nervosa: Self-  
742 report versus interview. *Int J Eat Disord* 2003;33:45-54.
- 743 61. Lock J, Agras WS, Bryson S, et al. A comparison of short- and long-term family therapy for adolescent  
744 anorexia nervosa. *Journal of the American Academy of Child and Adolescent Psychiatry* 2005;44:632-639.
- 745 62. Le Grange D, Lock J, Agras WS, et al. Moderators and mediators of remission in family-based treatment  
746 and adolescent focused therapy for anorexia nervosa. *Behaviour research and therapy* 2012 Feb;50(2):85-92.
- 747 63. Sievert YA, Schakel SF, Buzzard IM. Maintenance of a nutrient database for clinical trials. *Controlled*  
748 *clinical trials* 1989 Dec;10(4):416-425.
- 749 64. Schebendach JE, Mayer LE, Devlin MJ, et al. Dietary energy density and diet variety as predictors of  
750 outcome in anorexia nervosa. *The American journal of clinical nutrition* 2008 Apr;87(4):810-816.
- 751 65. Le Grange D, Lock J, Dymek M. Family-based therapy for adolescents with bulimia nervosa. *Am J*  
752 *Psychother* 2003;57(2):237-251.
- 753 66. Peebles R, Wilson JL, Lock JD. How do children with eating disorders differ from adolescents with  
754 eating disorders at initial evaluation? *J Adolesc Health* 2006 Dec;39(6):800-805.



- 755 67. Madden S, Miskovic-Wheatley J, Wallis A, et al. A randomized controlled trial of in-patient treatment  
756 for anorexia nervosa in medically unstable adolescents. *Psychol Med* 2014 Jul 14;14:1-13.
- 757 68. Refeeding hypophosphatemia in hospitalized adolescents with anorexia nervosa: a position statement of  
758 the society for adolescent health and medicine. *J Adolesc Health* 2014 Sep;55(3):455-457.
- 759 69. Russell GF, Szmukler GI, Dare C, et al. An evaluation of family therapy in anorexia nervosa and  
760 bulimia nervosa. *Archives of general psychiatry* 1987 Dec;44(12):1047-1056.
- 761 70. Eisler I, Dare C, Russell GF, et al. Family and individual therapy in anorexia nervosa. A 5-year follow-  
762 up. *Archives of general psychiatry* 1997 Nov;54(11):1025-1030.
- 763
- 764
