# Supplementary material
Source: PubMed Central journal article supplement (PMC7573797)
Supplement: jamapediatr-e203359-s002.pdf [file jamapediatr-e203359-s002.pdf]

## Supplementary Online Content

Garber AK, Cheng J, Accurso EC, et al. Short-term Outcomes of the Study of Refeeding to Optimize Inpatient Gains for patients with anorexia nervosa: a multicenter randomized clinical trial. *JAMA Pediatr*. Published online October 19, 2020. doi:10.1001/jamapediatrics.2020.3359

**eFigure.** Mean Daily Serum Electrolytes in Participants Treated With Higher-Calorie vs Lower-Calorie Refeeding

**eTable.** StRONG Trial Electrolyte Replacement Protocol

This supplementary material has been provided by the authors to give readers additional information about their work.

**eFigure.** Mean Daily Serum Electrolytes in Participants Treated With Higher-Calorie vs Lower-Calorie Refeeding

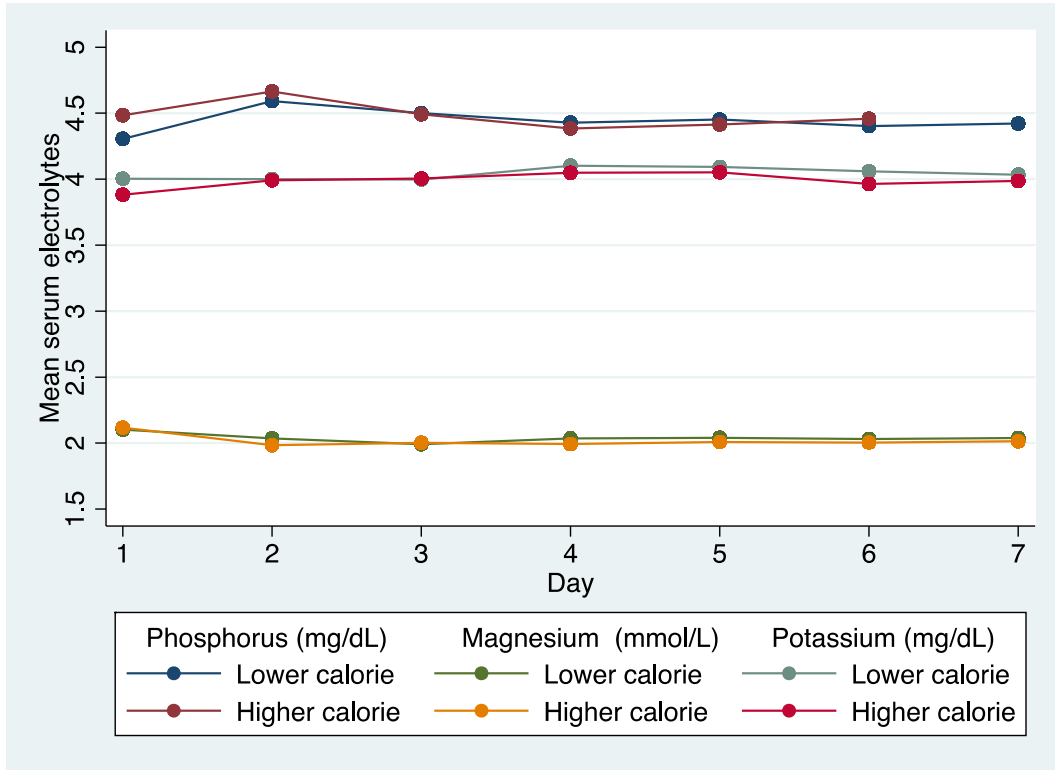

**eTable. StRONG Trial Electrolyte Replacement Protocol**

**\*\*Do NOT treat declining electrolytes in the normal range \*\***

*Hypokalemia*

|                           |                                                             |
|---------------------------|-------------------------------------------------------------|
| <b>K 3.1 - 3.4 mmol/L</b> | Extended release KCl 20 mEq PO. Recheck 8-12 hrs            |
| <b>K 2.5 - 3.0 mmol/L</b> | Extended release KCl 40 mEq PO. Recheck 8-12 hrs            |
| <b>K 2.2 - 2.4 mmol/L</b> | Extended release KCl 40 mEq PO STAT, Recheck 4 hrs & 12 hrs |
| <b>K &lt; 2.2 mmol/L</b>  | IV KCl; contact PICU                                        |

*Hypophosphatemia*

|                             |                                                           |
|-----------------------------|-----------------------------------------------------------|
| <b>Phos 2.5 - 2.9 mg/dL</b> | Phos-NaK 1 packet (250 mg) TID                            |
| <b>Phos 2.0 - 2.4 mg/dL</b> | Phos-NaK 2 packets (500 mg) TID                           |
| <b>Phos &lt; 2.0 mg/dL</b>  | IV Na-K-Phos 0.24 mmol/kg; max 15 mmol/dose; contact PICU |

*Hypomagnesemia*

|                           |                                                           |
|---------------------------|-----------------------------------------------------------|
| <b>Mg 1.3 - 1.7 mg/dL</b> | Mag-oxide 1 tablet (133-200 mg elemental Mg each) BID     |
| <b>Mg 1.0 - 1.2 mg/dL</b> | Mag-oxide 2 tablets (133-200 mg elemental Mg each) BID    |
| <b>Mg &lt; 1.0 mg/dL</b>  | IV Mg-SO <sub>4</sub> @50mg/kg; max 2g/dose; contact PICU |
