# Supplementary material
Source: PubMed Central journal article supplement (PMC7573797)
Supplement: jamapediatr-e203359-s003.pdf [file jamapediatr-e203359-s003.pdf]

## Data Sharing Statement

Garber. Short-term Outcomes of the Study of Refeeding to Optimize Inpatient Gains for Patients With Anorexia Nervosa. *JAMA Pediatr.* Published October 19, 2020. 10.1001/jamapediatrics.2020.3359

### Data

**Data available:** No

### Additional Information

**Explanation for why data not available:** Long-term follow-up is ongoing
